1 **Single-cell secretion analysis reveals a dual role for IL-10 in restraining and resolving the TLR4-**  
2 **induced inflammatory response**

3

4

5 Amanda F. Alexander<sup>1</sup>, Hannah Forbes<sup>1</sup>, Kathryn Miller-Jensen<sup>1,2,3,\*</sup>

6

7

8 <sup>1</sup>Yale University, Biomedical Engineering, New Haven, CT, USA, 06511

9 <sup>2</sup>Yale University, Molecular, Cellular, and Developmental Biology, New Haven, CT, USA, 06511

10 <sup>3</sup>Systems Biology Institute, Yale University, New Haven, CT, USA, 06511

11 \*Corresponding author. E-mail: [kathryn.miller-jensen@yale.edu](mailto:kathryn.miller-jensen@yale.edu)

12 **Abstract**

13 Following TLR4 stimulation of macrophages, negative feedback mediated by the anti-inflammatory  
14 cytokine IL-10 limits the inflammatory response. However, extensive cell-to-cell variability in TLR4-  
15 stimulated cytokine secretion raises questions about how negative feedback is robustly implemented. To  
16 explore this, we characterized the TLR4-stimulated secretion program in primary murine macrophages  
17 using a single-cell microwell assay that enabled evaluation of functional autocrine IL-10 signaling. High-  
18 dimensional analysis of single-cell data revealed three distinct tiers of TLR4-induced proinflammatory  
19 activation based on levels of cytokine secretion. Surprisingly, while IL-10 inhibits TLR4-induced activation  
20 in the highest tier, it also contributes to the TLR4-induced activation threshold by regulating which cells  
21 transition from non-secreting to secreting states. This role for IL-10 in restraining TLR4 inflammatory  
22 activation is largely mediated by intermediate IFN- $\beta$  signaling, while TNF- $\alpha$  likely mediates response  
23 resolution by IL-10. Thus, cell-to-cell variability in cytokine regulatory motifs provides a means to tailor  
24 the TLR4-induced inflammatory response.

## 25 **Introduction**

26 In the innate immune system, over-response, hyperinflammation, and dysregulation can lead to  
27 tissue damage (e.g., sepsis) and cause various autoimmune and metabolic diseases (Medzhitov, 2008).  
28 Therefore, tight regulation of the inflammatory response is necessary to maintain immune health (Peter J.  
29 Murray & Smale, 2012). A critical regulatory component shaping the innate immune response is cell-to-  
30 cell communication. Macrophages and dendritic cells both secrete cytokines and chemokines during  
31 inflammation, and also respond to those extracellular signals (Lee et al., 2009; Xue et al., 2015). TLR4  
32 stimulation results in the production of proinflammatory cytokines like tumor necrosis factor- $\alpha$  (TNF),  
33 immuno-regulatory cytokines like interferon- $\beta$  (IFN- $\beta$ ), and anti-inflammatory cytokines like IL-10. These  
34 proteins and other secreted factors are used by innate immune cells in both positive and negative feedback  
35 motifs mediated through cell-to-cell communication (Gottschalk et al., 2019; Hu et al., 2008; Lee et al.,  
36 2009).

37 Specifically, IL-10 is a known, potent, negative regulator necessary for inflammatory control and  
38 resolution (Peter J. Murray & Smale, 2012; Spits & de Waal Malefyt, 1992). Dysregulated or deficient IL-  
39 10 production is associated with inflammatory and autoimmune pathologies like septic shock, colitis, and  
40 rheumatoid arthritis (Shankar Subramanian Iyer & Cheng, 2012; Katsikis et al., 1994; Kühn et al., 1993).  
41 IL-10 negative feedback restricts activation of antigen presenting cells and the adaptive immune response,  
42 and specifically in TLR signaling, suppresses transcription of proinflammatory cytokines and chemokines  
43 (J. Chang et al., 2009; Conaway et al., 2017; Dagvadorj et al., 2008; Mittal & Roche, 2015; P. J. Murray,  
44 2005). While there is debate about the exact mechanisms behind IL-10-mediated inhibition, several studies  
45 cite STAT3-mediated suppression of NF- $\kappa$ B as a key contributor (DRIESSLER et al., 2004; Hovsepian et  
46 al., 2013; Hutchins et al., 2013). Various efforts have attempted to harness the anti-inflammatory  
47 capabilities of IL-10 to treat immune diseases characterized by hyperinflammation (Cannella et al., 1996;  
48 O'Garra et al., 2008). Unfortunately, these efforts have been largely unsuccessful (Saxena et al., 2015),

49 illustrating that more work is needed to fully elucidate IL-10 activity and regulation within the immune  
50 response.

51 One reason IL-10 negative feedback may be difficult to use therapeutically is because of its  
52 complex interactions with other regulatory motifs. Specifically, TNF and IFN- $\beta$  are both regulators of IL-  
53 10 production, as well as key paracrine signals shaping the overall macrophage inflammatory response.  
54 IFN- $\beta$  is an autocrine and paracrine mediator necessary for robust IL-10 secretion, resulting in a time lag  
55 in TLR4-mediated IL-10 production (E. Y. Chang et al., 2007; Howes et al., 2016; S. S. Iyer et al., 2010).  
56 Additionally, paracrine feedback mediated by “precocious” IFN- $\beta$ -producing cells has been implicated as  
57 a driver of cell-to-cell variation at the transcriptional level in dendritic cells (Shalek et al., 2014). TNF also  
58 promotes the secretion of IL-10, as well as other proinflammatory cytokines, following TLR4 stimulation  
59 (Caldwell et al., 2014; Muldoon et al., 2020). Analogous to IFN- $\beta$ , TNF is secreted heterogeneously by  
60 macrophages, and TNF “super-secretors” appear to play a predominant role in amplifying IL-6 and IL-10  
61 secretion in surrounding cells (Xue et al., 2015). The biological significance of having IL-10 regulated by  
62 two intermediate cytokines exhibiting high cell-to-cell variability is largely unknown, and it raises questions  
63 regarding the role of these paracrine signaling motifs in shaping the overall response.

64 To explore these questions, we investigated the role of IL-10 negative feedback in shaping the  
65 TLR4-induced macrophage secretion response. To account for the extensive cell-to-cell heterogeneity in  
66 extracellular signaling, we used a microwell assay that allows autocrine signaling without interference from  
67 signals from neighboring cells to measure multiplexed cytokine secretion in individual cells. We  
68 characterized the TLR4-stimulated response in primary murine bone marrow-derived macrophages  
69 (BMDMs) with and without IL-10 negative feedback. We found that activated macrophages lie along a  
70 trimodal, heterogeneous, pro-inflammatory axis, with IL-10 negative feedback modulating the distribution  
71 of cells within each activation tier. While IL-10 restrained activation of highly activated macrophages, its  
72 primary effect, mediated by relatively low levels of IL-10 secretion, was to raise the threshold of activation  
73 for low and non-responder cells. IL-10’s effect on the TLR4 activation threshold was largely mediated by  
74 IFN- $\beta$ , and together these cytokines regulated the fraction of cells that mount a robust inflammatory



75 response in a population. In contrast, positive feedback by TNF increased IL-10 levels in highly activated  
76 macrophages, which in turn resolved the response in those cells. Thus, our study disentangles IL-10  
77 signaling to reveal two distinct functional roles in negatively regulating the TLR4 inflammatory response.

78

## 79 **Results**

### 80 **IL-10 suppresses TLR4-induced pro-inflammatory activation in a dose-dependent manner**

81 Most secreted proteins induced by TLR4 stimulation in macrophages, including TNF, IL-6, and  
82 IL-12, carry out proinflammatory functions, but secretion of the anti-inflammatory cytokine IL-10 also  
83 plays an important role in the microbial response (Peter J. Murray & Smale, 2012). TLR4-induced IL-10  
84 negatively regulates the inflammatory response, but IL-10 negative feedback is complicated by the fact that  
85 IL-10 is induced by the same signals it regulates, specifically TNF and IFN- $\beta$  (Fig. 1A). To characterize  
86 the role of anti-inflammatory IL-10 within the TLR4 response, we stimulated BMDMs in population with  
87 TLR4 agonist lipopolysaccharide (LPS) at 100 ng/mL. We collected cell supernatant at 0, 4, 8, 10, 12, and  
88 24 hours post-stimulation, and quantified the concentration of TNF and IL-10 by ELISA. We found  
89 concurrent increases in both TNF and IL-10 secretion through 8 hours, when TNF concentration peaked in  
90 the population. After 8 hours, TNF concentration slowly decreased, while IL-10 continued to rise, reaching  
91 its maximum concentration at approximately 12 hours and remaining at that level through 24 hours (Fig.  
92 1B). These results are consistent with the previously reported time lag in TLR4-induced IL-10, relative to  
93 proinflammatory cytokines (E. Y. Chang et al., 2007; Ernst et al., 2019; S. S. Iyer et al., 2010).

94 To better understand the effect of stimulation dose on IL-10 secretion, we stimulated BMDMs in  
95 population with increasing doses of LPS spanning 5 orders of magnitude (0.1 – 1000 ng/mL). We collected  
96 cell supernatants after 8 and 24 hours, and measured TNF and IL-10 concentration by ELISA. The 8 and  
97 24-hour time points were chosen because they marked peak and reduced TNF concentrations (Fig. 1B), and  
98 we hypothesized the reduction was caused at least in part by paracrine-mediated negative feedback from  
99 IL-10. The 8 and 24-hour dose responses both showed that above 1 ng/mL LPS there is steep induction of  
100 TNF and IL-10 secretion, with TNF reaching its peak between 5 and 10 ng/mL LPS (Fig. 1C and Fig. S1A).

101 This switch-like induction of TNF is consistent with a known threshold of TLR4-induced inflammatory  
102 activation mediated by MAPK intracellular signaling (Fig. S1B), which has been previously described  
103 (Gottschalk et al., 2016). We also found TNF secretion was significantly reduced following stimulation  
104 with high doses of LPS (100 and 1000 ng/mL). In contrast, IL-10 secretion continued to rise as LPS dose  
105 increased up to 1000 ng/mL at both 8 and 24 hours (Fig. 1C and Fig. S1A). These results reveal strong  
106 dose-dependence for IL-10 secretion and an inverse dose response for TNF and IL-10 at high LPS doses.

107 To directly measure how IL-10 negative feedback affects TLR4-induced proinflammatory  
108 secretion at high doses, we stimulated BMDMs with 100 ng/mL LPS alone, or in combination with an IL-  
109 10 receptor blocking antibody (IL-10R Ab) to remove negative feedback, or in combination with  
110 recombinant IL-10 to impose IL-10 negative feedback on the entire population. After 24 hours, cell  
111 supernatant was collected and several cytokines were measured by ELISA (Fig. 1D). We found that  
112 blocking IL-10 negative feedback via IL-10R Ab significantly increased the production of pro-  
113 inflammatory cytokines TNF, IL-6, IL-27, and IFN- $\beta$ , consistent with previous reports (P. J. Murray, 2005;  
114 Xue et al., 2015). Consistently, co-stimulating BMDMs with LPS and recombinant IL-10 significantly  
115 decreased the secretion of TNF, IL-6, IL-27, and IFN- $\beta$ . These data confirm that the anti-inflammatory  
116 effect of secreted IL-10 is both time and dose-sensitive.

117

### 118 **High-dimensional analysis reveals TLR4-activated macrophages exhibit dose-dependent digital and** 119 **analog activation of the proinflammatory secretion program**

120 Substantial cell-to-cell variability is a defining attribute of TLR-stimulated macrophage secretion  
121 (Lu et al., 2015; Ramji et al., 2019), and this variability plays a key role in permitting rapid and reproducible  
122 innate immune responses (Eberwine & Kim, 2015). While our secretion results from BMDMs in a  
123 population clearly show the potent anti-inflammatory effects of IL-10 signaling within the TLR4-induced  
124 response, they are unable to capture the cellular heterogeneity that exists. Therefore, to build upon our  
125 results at the population level and explore how IL-10 negative feedback varies across individual  
126 macrophages, we conducted multiplexed, single-cell, secretion profiling (Lu et al., 2013). We measured 12

127 cytokines, chemokines, and other canonical TLR4-induced secreted factors in order to sample the full range  
128 of macrophage functional responses (Table 1 and Materials and Methods). In this microwell format, cells  
129 are isolated such that functional autocrine signaling proceeds without interference from paracrine signals  
130 produced by neighboring cells.

131 We first investigated the dose-dependence of IL-10 secretion in the TLR4 response in isolated cells.  
132 We stimulated BMDMs with a range of LPS doses (0, 10, 100, 1000 ng/mL) for 8 hours in the microwell  
133 device (Fig. 2A). As in the cell population, we observed dose-dependent increases in TLR4-mediated  
134 production of TNF and IL-10. Single-cell resolution demonstrated that this dose dependence was due to  
135 both the percentage of cells secreting each cytokine above background and the intensity of that secretion  
136 (Fig. 2B and 2C). Interestingly, the average observed fraction of cells secreting TNF was approximately  
137 40%, while fewer than 20% of BMDMs secreted IL-10, even at the highest doses (Fig. 2C). We hypothesize  
138 that the fraction of cells responding in the device may be lower than in a population due to the loss of  
139 paracrine signaling in the microwell device, which has been shown to amplify cellular responses (Lee et  
140 al., 2009; Shalek et al., 2014; Xue et al., 2015; Youk & Lim, 2014).

141 To explore the complexity in single-cell secretion responses, we visualized our high-dimensional,  
142 single-cell data in two-dimensional space using an unsupervised dimensionality reduction algorithm called  
143 PHATE (potential of heat diffusion for affinity-based transition embedding) (Moon et al., 2019). PHATE  
144 uses a diffusion mapping algorithm to visualize continual progressions, branches, and transition states  
145 within biological data. For the PHATE analysis, we included data from all four LPS dose stimulations and  
146 included measurements only from functional macrophages, which we defined as cells secreting at least one  
147 protein from Table 1. Our final PHATE analysis included secretion measurements of ten cytokines: TNF,  
148 IL-10, IL-6, IL-12p40, IL-27, CXCL1, CCL3, CCL5, GM-CSF, and IFN- $\beta$ . CCL2 and Chi3l3 were excluded  
149 from the analysis because they were not clearly regulated by LPS.

150 Projecting our single-cell data onto two dimensions revealed that most macrophages lay parallel to  
151 the horizontal PHATE 1 axis. At one end of the axis were mostly quiet cells secreting few proteins, while  
152 on the other end were macrophages secreting high levels of multiple cytokines/chemokines (C/Cs) (i.e.,

153 polyfunctional secretion; Fig. 2D). We found a strong correlation between the averaged secretion intensity  
154 across C/Cs and the PHATE 1 coordinates of individual BMDMs (Fig. 2G, left). In addition, BMDMs  
155 demonstrated a strong correlation between polyfunctionality, or the number of C/Cs being co-secreted, and  
156 their PHATE 1 coordinates (Fig. 2G, right). Taken together, the PHATE 1 axis reveals information about  
157 graded variability in the secretion response, and also captures the digital on/off response in regards to  
158 individual cytokine activation.

159         When we overlaid the effect of LPS dose on the placement of BMDMs along the PHATE axes, we  
160 found that unstimulated cells mostly occupied the quiet end of the PHATE 1 activation axis, characterized  
161 by low relative cytokine secretion or high secretion of only CCL3. Stimulating with 10 ng/mL LPS moved  
162 cells into the PHATE 1 activation axis, with a small population of cells secreting inflammatory C/Cs at  
163 higher intensities, though the majority of cells remained in the quiet/low activation portion. Increasing LPS  
164 dose to 100 and 1000 ng/ml led to higher numbers of cells throughout the PHATE 1 activation axis, further  
165 populating the middle and far-right end (Fig. 2E). At 1000 ng/ml LPS, the density of cells in the highest  
166 activated region of the PHATE 1 axis decreased, consistent with IL-10 negative regulation at this dose (Fig.  
167 1B).

168         Estimating the kernel density of TLR4-stimulated cells across PHATE 1 identified a trimodal  
169 response with three distinguishable levels of a graded activation (inactive/low, intermediate, and high) (Fig.  
170 2F, arrows). Examining the individual doses within the response, we observed unstimulated cells were  
171 located almost exclusively in the inactive/low activation tier, and as LPS dose increased, cells moved into  
172 the intermediate and high tiers. Notably, with the 100 ng/mL LPS stimulation dose, a greater proportion of  
173 cells resided in the high activation tier compared to the 1000 ng/mL dose. This suggests that in the presence  
174 of high levels of bacterial threat, regulatory mechanisms tailor the TLR4-stimulated dose response to avoid  
175 excessive proinflammatory activation, possibly through secretion of anti-inflammatory IL-10.

176

177 **High-dimensional analysis reveals IL-10 negative feedback modulates heterogeneity in the**  
178 **macrophage responder population**

179 As mentioned above, LPS-stimulated BMDMs displayed strong correlations between their PHATE  
180 1 coordinates and the average signal intensity across cytokines, as well as their polyfunctionality (Fig. 2G).  
181 Importantly, however, the strength of the correlation between the magnitude of secretion (i.e. signal  
182 intensity) from individual cells and the PHATE 1 coordinate varied by C/C (Fig. S2). Cytokines associated  
183 with the proinflammatory response (TNF, CCL5, CXCL1, and IL-6) exhibited the strongest PHATE 1  
184 correlation (Pearson  $R \geq 0.6$ ), suggesting cell placement along that axis predominantly captures the degree  
185 of proinflammatory activation. In contrast, we observed weak correlation for IL-10, IL-27, and IFN- $\beta$ ,  
186 cytokines associated with anti-inflammatory or immuno-regulatory functions. IL-27 and IFN- $\beta$  have both  
187 been implicated as paracrine signals mediating the secretion of anti-inflammatory IL-10 (Fitzgerald et al.,  
188 2013; S. S. Iyer et al., 2010). The lack of strong correlation between IL-10 and the pro-inflammatory  
189 PHATE 1 axis suggested that IL-10 may not be acting solely to resolve the pro-inflammatory response.

190 To explore this possibility, we next compared stimulation with LPS alone to stimulations in  
191 combination with IL-10R Ab to block IL-10 negative feedback, or in combination with recombinant IL-10  
192 to uniformly impose IL-10 negative feedback (Fig. 3A). We overlaid the effect of stimulation dose on the  
193 placement of activated BMDMs along the PHATE axes to determine the effects of IL-10 negative feedback  
194 (Fig. 3B). Blocking IL-10 negative feedback with IL-10R Ab resulted in more highly-activated cells at the  
195 far-right end of the axis for both 100 and 1000 ng/mL in contrast to stimulating with LPS alone (Fig. 3C).  
196 However, the more significant effect of blocking IL-10 autocrine signaling was a noticeable shift in  
197 activated BMDMs from the low-responding region of the PHATE 1 axis to the more activated middle  
198 portion of the axis (Fig. 3C). In contrast, adding recombinant IL-10 dampened the proinflammatory  
199 response, with activated BMDMs exhibiting very little spread into the PHATE 1 activation axis (Fig. 3D).  
200 These data suggest that while IL-10 constrains highly activated macrophages, IL-10 negative feedback also  
201 acts to restrain low-activated cells.

202 To further examine this shift, we analyzed the kernel density estimate for cells along the PHATE 1  
203 axis. We again identified the trimodal response with low, intermediate, and high levels of graded activation  
204 (Fig. 3E). Comparing cells stimulated with LPS alone to those co-stimulated with LPS and IL-10R Ab, we  
205 observed a higher proportion of cells in the low and intermediate activated states with just LPS alone.  
206 Blocking IL-10 negative feedback resulted in a decrease in the proportion of cells in the low activation  
207 region and an increase in the proportion of cells within the intermediate and high activation states. Adding  
208 recombinant IL-10 led to very high proportions of BMDMs in the low activation region at all LPS doses.

209 This population-wide shift in the secretion response due to perturbing IL-10 signaling was  
210 surprising, given a relatively low percentage of cells secrete high levels of IL-10 compared to other  
211 proinflammatory cytokines after LPS stimulation (Fig. 2B and C). The scope of the effect suggests IL-10  
212 autocrine signaling can alter individual macrophage responses in the microwell device at relatively low  
213 concentrations. Notably, IL-10 perturbation had the greatest effect at the 100 ng/mL LPS dose, while the  
214 effect was much less significant at the 10 ng/mL LPS dose. This implies that IL-10 negative feedback is a  
215 dose-dependent mechanism, requiring a certain level of TLR4 activation to observe its regulation. The  
216 observation that the greatest effect of IL-10 signaling would occur at the highest levels of stimulation is  
217 consistent with our previous finding that IL-10 production is highly sensitive to stimulation dose. Overall,  
218 this analysis revealed IL-10 negative feedback regulates heterogeneity in activated BMDMs within the  
219 graded TLR4 dose response.

220

### 221 **Blocking IL-10 negative feedback increases TLR4 activation in low and non-responder macrophages**

222 In our PHATE visualizations, we observed the greatest impact of IL-10 autocrine signaling on cells  
223 in the low-responding region of the activation axis. Given this result, we speculated that low and non-  
224 responding cells may be primary targets of IL-10 negative feedback. This effect could be direct, and could  
225 also act indirectly via IL-10 negative regulation of TNF activation, which positively regulates other  
226 cytokines (Fig. 1A) (Caldwell et al., 2014; Xue et al., 2015).

227 To explore the effect of IL-10 on TNF, we converted single-cell secretion intensities from the  
228 microwell device to individual protein concentration values using recombinant protein standard curves (Fig.  
229 S4). Concentrations below the threshold of detection in the microwell device were set to 1 pg/ml (i.e., 0 on  
230 a log scale) for visualization, which was just below the lowest extrapolated concentrations detected in  
231 individual cells. Probability histograms showing single-cell TNF secretion in the microwell device revealed  
232 that blocking IL-10 signaling increased the percentage of cells secreting TNF, and therefore conversely  
233 decreased the non-responder population (Fig 4A). The IL-10 mediated increase in the activated population  
234 is a result of non-activated macrophages becoming low-level TNF secretors, rather than activated cells  
235 secreting more TNF. In contrast, adding recombinant IL-10 significantly decreased the percentage of cells  
236 responding to LPS stimulation and the average level of secretion amongst responding cells, and thus greatly  
237 increased the TNF non-responder subpopulation.

238 We further examined the protein concentration data for IL-6 and CCL5, and calculated the  
239 percentage of cells secreting each individual cytokine above threshold, as well as the average protein  
240 secretion across the responding cell population (excluding non-responding cells). Similar to its effect on  
241 TNF, blocking IL-10 negative feedback significantly increased the percentage of cells producing IL-6 and  
242 CCL5, while in contrast, adding recombinant IL-10 greatly reduced the percentage of cells secreting these  
243 proinflammatory cytokines (Fig. 4B). However, we found blocking IL-10 negative feedback had no effect  
244 on the average level of secretion in the responder population at 100 ng/mL LPS, and even decreased the  
245 average level of secretion in the responder population at 1000 ng/mL LPS stimulation (Fig. 4B), presumably  
246 due to recruitment of low-level secretors into the activated population. These data suggest that IL-10  
247 negative feedback acts to block the total number of cells secreting TNF and other proinflammatory  
248 cytokines, rather than acting solely to reduce proinflammatory secretion in activated cells.

249

250 **Conditional-density visualization reveals low and high levels of IL-10 negative feedback differentially**  
251 **modulate proinflammatory activation in the TLR4 response.**

252 A surprising observation upon blocking IL-10 negative feedback is that the affected responder  
253 population is larger than the subpopulation of cells secreting IL-10. For example, at 100 ng/mL LPS  
254 stimulation, an average of 13.1% [11.6, 14.7] (95% CI) of cells secreted IL-10 above background in the  
255 microwell device (Fig. 2C). However, blocking IL-10 negative feedback at this same dose caused the  
256 percentage of cells secreting IL-6 to increase 17.6% [15.1, 19.8], and the percentage of cells secreting CCL5  
257 to increase 16.1% [14.4, 17.8] (Fig. 4B). This discrepancy suggests IL-10 may elicit negative feedback at  
258 concentrations below the limit of detection in the microwell device.

259 To investigate this further, we examined how the concentration of secreted TNF varied with the  
260 concentration of secreted IL-10 using conditional density re-scaled visualization (DREVI) (Krishnaswamy  
261 et al., 2014). DREVI rescales multiplexed single-cell data points by their conditional density in order to  
262 robustly visualize relationships between proteins across a larger dynamic range. In this case, DREVI  
263 allowed us to emphasize the small number of cells that exhibited low levels of IL-10 secretion (i.e., < 10  
264 pg/ml) and look at the effect of this secretion on TNF. We pooled our interpolated microwell secretion data  
265 from all stimulation doses (0, 10, 100, 1000 ng/mL LPS) with and without IL-10 receptor blocking, and  
266 then we confined our DREVI analysis to individual BMDMs producing both cytokines.

267 DREVI analysis of the co-secretion relationship between TNF and IL-10 after LPS stimulation  
268 identified three tiers of activation (low, intermediate, and high), similar to PHATE. Within each tier, as IL-  
269 10 increased, the concentration of TNF plateaued or decreased (Fig. 4C, left). Blocking IL-10 negative  
270 feedback altered the functional relationship between these two cytokines, specifically at the lowest  
271 concentrations of IL-10 (< 10 pg/ml) and highest concentrations of IL-10 (> 300 pg/ml; Fig. 4C, right).  
272 With LPS alone, we observed low levels of TNF were co-produced with low levels of IL-10; similarly,  
273 intermediate levels of TNF were co-produced with intermediate levels of IL-10, and high levels of TNF  
274 with high levels of IL-10. In comparison, without IL-10 negative feedback, we observed co-production of  
275 low levels of IL-10 secretion with both low and intermediate levels of TNF secretion. This suggests that



276 low concentrations of IL-10 negative feedback prevented low TNF-responders (or non-responders) from  
277 becoming intermediate responders. Further, without IL-10 negative feedback we observed the highest tier  
278 of TNF activation no longer plateaued with increased IL-10, but instead continued to increase (Fig. 4D).

279 Examining the co-secretion relationship between IL-6 and IL-10 in BMDMs stimulated with LPS  
280 alone revealed only two levels of IL-6 activation: intermediate and high (Fig. S5A, left). We observed low  
281 concentrations of IL-10 co-produced with intermediate levels of IL-6, and then a sharp increase in IL-6  
282 secretion coinciding with intermediate IL-10 secretion (> 50 pg/ml). At the highest concentrations of IL-10  
283 secretion, we saw the levels of co-produced IL-6 dramatically decrease back down to intermediate levels,  
284 consistent with IL-10-mediated negative feedback. In contrast, without IL-10 receptor signaling, we  
285 observed a fraction of cells co-producing high levels of IL-10 and high levels of IL-6 (Fig. S5A, right and  
286 Fig. S5B). Interestingly, we still observed a fraction of cells with decreased IL-6 secretion at high IL-10  
287 concentrations, even when IL-10 signaling was blocked, suggesting there are IL-10-independent negative  
288 feedback mechanisms that also act to resolve high IL-6 responders following TLR4 activation.

289 In addition, blocking IL-10 signaling resulted in a new population of cells exhibiting low IL-6  
290 activation at low concentrations of IL-10 (Fig. S3A, right; Fig. S3B). As mentioned above, the DREVI plots  
291 only include cells secreting both IL-6 and IL-10, which means non-responding cells are not visualized in  
292 the DREVI plots. Given the observation that blocking IL-10 negative feedback almost doubles the  
293 percentage of cells that secrete IL-6 (Fig. 4B), it is likely that additional cells that were non-responders (and  
294 thus not shown) in the DREVI plot for LPS alone, are now included and create a new tier of cells secreting  
295 low concentrations of IL-6. Overall, our data establishes that low concentrations of IL-10 are sufficient to  
296 regulate heterogeneity in the TLR4 response.

297

298 **IFN- $\beta$  largely mediates IL-10 regulation of the threshold for TLR4 activation, while TNF positive**  
299 **feedback activates the resolving role of IL-10.**

300 IL-10 is induced by LPS and also by paracrine signaling from other LPS-induced cytokines in  
301 macrophages, specifically TNF and IFN- $\beta$  (Fig. 1A). To determine to what extent the IL-10 negative

302 feedback regulation we observed is mediated by paracrine signaling of TNF and IFN- $\beta$ , we again performed  
303 multiplexed single-cell secretion profiling on BMDMs stimulated with 100 ng/mL LPS alone, or co-  
304 stimulated with soluble TNF receptor (sTNFR) to block TNF autocrine signaling, or an interferon- $\alpha/\beta$   
305 receptor blocking antibody (IFNAR Ab) to block IFN- $\beta$  autocrine signaling. We confirmed that both  
306 sTNFR and IFNAR Ab significantly reduced the fraction of cells secreting IL-10 as well as the magnitude  
307 of that secretion (Fig. 5C and S6), confirming roles for TNF and IFN- $\beta$  in promoting IL-10 production.

308 We combined our sTNFR and IFNAR Ab results with our previous IL-10R Ab experiment, and  
309 visualized the high-dimensional secretion data with PHATE. Co-stimulation with sTNFR substantially  
310 diminished the proinflammatory response, as evidenced by the lack of cells throughout the PHATE 1  
311 proinflammatory axis (Fig. 5A-B), and by significant decreases in the percentage of cells producing  
312 inflammatory cytokines IL-6, IL-27, CXCL1, and CCL5 (Fig. 5C). These results are consistent with the  
313 role of TNF as a strong positive regulator of the TLR4 response. This loss of this positive feedback  
314 prevented a direct analysis of the effect of IL-10 reduction on the activation of TLR4-stimulated responder  
315 macrophages.

316 In contrast, cells co-simulated with IFNAR increased their proinflammatory activity, as evidenced  
317 by movement of cells farther into the proinflammatory activation axis (Fig. 5B), and by significant increases  
318 in the percentage of cells secreting TNF, IL-6, CXCL1, and CCL5, which was similar to what we observed  
319 when blocking IL-10 signaling via co-stimulation with anti-IL10R Ab (Fig. 5C). There were, however,  
320 differences in how blocking IL-10 signaling versus IFN- $\alpha/\beta$  signaling affected secretion of individual  
321 proteins. For example, the fraction of BMDMs secreting IL-27 and CCL3 remained unchanged with IL-10  
322 signaling blocked, but significantly increased when IFNAR was blocked. Despite these differences, overall,  
323 we found significant functional crossover between negative feedback from IL-10 and IFN- $\beta$  in both the  
324 digital and analog components of the TLR4 response.

325 We again analyzed the kernel density estimate for cells along the PHATE 1 axis to further visualize  
326 the effects of blocking different paracrine signals. Blocking TNF moved most BMDMs into the lowest tier  
327 of TLR4 activation, consistent with its primary role in positive feedback. IFNAR blocking resulted in a

328 significant increase in BMDMs mostly in the intermediate tier of activation, but did not increase activation  
329 in the highest tier. In contrast, blocking IL-10R increased BMDMs in both the intermediate and high  
330 activation tiers (Fig. 5D). Taken together, these data raise the possibility that TNF, or another paracrine  
331 signal, is promoting IL-10 secretion primarily in the highest activation tier.

332 Our evidence that IL-10 and IFN- $\beta$  negative feedback largely act to restrain cells from responding  
333 to LPS led us to postulate that IL-10 may play a role in setting the threshold for TLR4 activation. A dose-  
334 dependent threshold for TLR4 activation has been previously described (Gottschalk et al., 2016) and was  
335 clearly evident in the activation of TNF secretion (Fig. 1C and S1). To explore a role for IL-10 in setting  
336 this threshold, we stimulated BMDMs in a plate with increasing doses of LPS alone or co-stimulated with  
337 IL-10R Ab or IFNAR Ab. After 24 hours, we collected cell supernatants and measured TNF concentration  
338 by ELISA. We found that with LPS stimulation alone, we observed TNF induction above 1 ng/mL LPS  
339 stimulation dose, but with IL-10 or IFN- $\beta$  extracellular signaling blocked, we saw TNF induced between  
340 0.1 and 1 ng/mL LPS (Fig. 5E). This data show that IL-10, mediated by IFN- $\beta$  paracrine signaling,  
341 contributes to a threshold of TLR4-induced proinflammatory activation.

342

## 343 **Discussion**

344 Macrophages exhibit heterogeneous inflammatory secretion (Lu et al., 2015; McWhorter et al.,  
345 2016), while simultaneously responding to the cytokines they secrete and the cytokines secreted by  
346 neighboring cells (Gautier et al., 2005; Rand et al., 2012; Xue et al., 2015). To ensure a response that is  
347 targeted for the appropriate level of immune threat while avoiding tissue damage due to hyperinflammation,  
348 macrophages use paracrine communication networks (Peter J. Murray & Smale, 2012). The secretion of  
349 anti-inflammatory IL-10 following TLR4 stimulation is a negative feedback mechanism that combats  
350 hyperinflammation. In this study, we used a combination of single-cell and population assays to investigate  
351 the role of IL-10 negative feedback in implementing the heterogeneous TLR4 secretion response.

352 First, our results confirmed that the potent immunosuppressive effect of IL-10 secretion in TLR4-  
353 stimulated macrophages is both time and dose-sensitive (Fig. 1B and 1C). This time sensitivity is supported

354 by literature that shows production of paracrine signals such as IFN- $\beta$  and IL-27 are required for robust  
355 TLR4-induced IL-10 production, resulting in a time delay (E. Y. Chang et al., 2007; Ernst et al., 2019; S.  
356 S. Iyer et al., 2010). Further, the switch-like dose response we observed in IL-10 and TNF secretion  
357 induction at both 8 and 24 hours provides evidence that a previously identified switch-like activation  
358 threshold in upstream MAPK signaling is further perpetuated at the level of functional output (Fig. 1C and  
359 S1). While these thresholds exemplify a cell-intrinsic mechanism of dose discrimination, the inverse  
360 relationship between TNF and IL-10 at high LPS doses indicates proinflammatory activation is further  
361 influenced by extracellular signals and cell-cell communication.

362 High-dimensional analysis of single-cell secretion data revealed a graded response along an  
363 extended axis of proinflammatory secretion encompassing both the digital (on/off) and analog (graded)  
364 activation components (Fig. 2). Using the dimensionality reduction algorithm PHATE (Moon et al., 2018)  
365 we observed correlation between single-cell coordinates along the horizontal PHATE 1 axis and secretion  
366 intensity of several proinflammatory cytokines (Fig. S2). Distinctly, secretion of IL-10, IL-27, and IFN- $\beta$   
367 did not correlate strongly with the PHATE 1 axis (Fig. S2), suggesting that regulation of  
368 immunomodulatory cytokines is separate from proinflammatory cytokines, and that these regulatory  
369 decisions vary across individual cells. This diversification is likely another strategy used by macrophages  
370 to restrain proinflammatory secretion.

371 Using kernel density estimation along the PHATE 1 axis, we identified trimodal activation of  
372 proinflammatory secretion, a pattern that was even clearer after blocking IL-10 negative feedback (Fig. 2  
373 and Fig. 3). Previous studies have identified bimodal cytokine production when measuring production of a  
374 single protein, such as TNF or IL-6 (Muldoon et al., 2020; Shalek et al., 2013), which is consistent with our  
375 observed intermediate and high activation tiers. Our analysis expands on those observations by  
376 simultaneously measuring 12 cytokines and chemokines that are co-produced in the TLR4 response. This  
377 multiplexed analysis revealed an additional mode of low activation, in which cells secrete few cytokines at  
378 low intensity, or only robustly secrete chemokines such as CCL3.

379 Previous work in our lab identified functional clusters within TLR-stimulated macrophages instead  
380 of activation tiers within a continuum. Specifically, our study of U937 macrophages and human MDMs  
381 identified loosely defined functional subgroups after stimulation with various TLR agonists (Lu et al.,  
382 2015). Notably, the majority of these subgroups were defined based on varied degrees of activation as  
383 opposed to the secretion of entirely different proteins. It follows that our inclusion of additional doses of  
384 TLR4 agonist instead of a single dose allowed further visualization of the full range of macrophage  
385 activation, and we hypothesize some of the previously identified subgroups may have represented snapshots  
386 of different activation tiers as opposed to functionally distinct clusters.

387 Our study further shows how the TLR-induced macrophage secretion response is regulated through  
388 both positive and negative feedback motifs mediated through paracrine signals. Multiplexed single-cell  
389 secretion profiling revealed how blocking IL-10 signaling with IL-10R Ab primarily suppressed activation  
390 in low and non-responding cells, with a minimal effect on the highest activated cells (Fig. 3). This  
391 widespread effect of IL-10 was disproportionate to the level of IL-10 secretion we observed, and using  
392 DREVI, a novel analysis method that specializes in identifying relationships between proteins that may be  
393 obscured by insufficient sampling density (Krishnaswamy et al., 2014), we confirmed low concentrations  
394 of IL-10 were responsible for negative feedback in the low-activation macrophage population (Fig. 4 C and  
395 D). Similarly, DREVI confirmed high levels of IL-10 were responsible for tamping down inflammatory  
396 cytokine production in the high activation macrophage population. These results confirm a dual role for IL-  
397 10 in both restraining and resolving the TLR4-induced macrophage secretion response.

398 While IL-10 acts via paracrine signaling to negatively regulate the TLR4 response, there is an  
399 additional layer of regulation in that IL-10 secretion is induced by the paracrine signals TNF and IFN- $\beta$ .  
400 Our results expand on the complexity of this regulation, revealing that TNF and IFN- $\beta$  appear to mediate  
401 different functional roles of IL-10 within the TLR4-stimulated macrophage response (Fig. 5). Blocking  
402 IFN- $\beta$  signaling specifically increased the fraction of macrophages in the intermediate activation tier but  
403 did not affect macrophages in the high activation tier, in contrast to blocking IL-10 signaling, which affected  
404 both (Fig. 5D). This suggests that IFN- $\beta$ -mediated IL-10 restrains cells at the low end of the

405 proinflammatory axis, while other paracrine signals—TNF and possibly others—mediate IL-10 negative  
406 regulation of cells in the highest activation tier (Fig. 6).

407 Building on our observations from the single-cell data, we demonstrated that IL-10 and IFN- $\beta$  elicit  
408 their negative feedback by raising the threshold for TLR4 activation in a population of macrophages (Fig  
409 5E). While the relationship between IL-10 and IFN- $\beta$  and their anti-inflammatory function have been well  
410 documented in literature (E. Y. Chang et al., 2007; McNab et al., 2014; Shalek et al., 2014), a recent study  
411 of BMDMs stimulated with varied classes of bacteria demonstrated IFN- $\beta$  negative feedback mechanisms  
412 independent of IL-10 (Gottschalk et al., 2019). Our analysis was unable to completely delineate IFN- $\beta$   
413 negative feedback from IL-10 negative feedback; therefore, further studies are necessary to illuminate their  
414 distinct roles in the anti-inflammatory response.

415 In contrast to IFN- $\beta$ , reducing TNF paracrine signaling with sTNFR resulted in a significant  
416 reduction in the secretion of proinflammatory cytokines from individual TLR4-stimulated macrophages in  
417 the microwell device (Fig. 5). Blocking TNF signaling limited the number of macrophages that entered the  
418 intermediate activation tier, and prevented macrophages from reaching the high activation tier. This finding  
419 builds upon ample research on TNF positive feedback enhancing secretion of other proinflammatory  
420 cytokines (Covert, 2005; Werner, 2005; Xue et al., 2015). Further, our results show the loss of TNF positive  
421 feedback via autocrine signaling has a larger effect on the overall response than the reduction in autocrine  
422 IL-10 negative feedback. Interestingly, previous work in our lab found co-stimulating macrophages with  
423 LPS and recombinant TNF to create a uniform TNF signal did not amplify proinflammatory secretion (Xue  
424 et al., 2015). This suggests there is a limit to proinflammatory amplification from TNF positive feedback,  
425 and the interaction of positive and negative feedback motifs enables fine-tuning of the overall inflammatory  
426 response.

427 Our finding that TNF is a major autocrine regulator of the TLR4 response is in contrast to Caldwell  
428 et al., which reported that in response to LPS, TNF engaged exclusively in paracrine signaling to  
429 neighboring, non-macrophage cells (Caldwell et al., 2014). The authors argued that weaker TLR stimuli  
430 such as CpG (TLR9 agonist) exhibited TNF-enhanced NF- $\kappa$ B activity, but the speed and duration of TLR4-

431 stimulated NF- $\kappa$ B activity eliminated the possibility for autocrine enhancement. One reason for the  
432 differences in our studies could be due to the loss of paracrine signaling in the microwell device. As  
433 previously described, paracrine signaling amplifies macrophage TLR4 responses (Xue et al., 2015), and  
434 therefore in the microwell device the TLR4 response may be weaker. It follows that the effect of sTNFR  
435 may then be amplified due to this lack of additional TNF signals from neighboring cells. We speculate that  
436 the weaker response in the microwell device induces levels of NF- $\kappa$ B activation that can be amplified by  
437 TNF autocrine signaling.

438 This work highlights the importance of combining both population and single-cell analysis methods  
439 to form a more complete picture of immune cell behavior. While great progress has been made in single-  
440 cell analysis methods, further work must be done to improve and expand the options for single-cell  
441 functional secretion analysis. There are limits to the regulatory mechanisms that can be uncovered in our  
442 microwell device. For instance, our device cannot capture dynamics of macrophage secretion. Our assay  
443 measures cumulative secretion over time, and it is possible that proteins that appear to be co-secreted are  
444 in reality sequentially secreted. Parsing the specifics of that polyfunctionality would require further assay  
445 development. Additionally, the microwell device cannot investigate spatial regulation within the TLR4  
446 response. Cell density and quorum sensing have been cited as additional regulators of macrophage  
447 activation (Muldoon et al., 2020), and further illumination of these mechanisms would inform higher order  
448 immune regulation and deepen our understanding of macrophage behavior in vivo.

449 Overall, our research revealed important aspects of the sophisticated network guiding population-  
450 level macrophage secretion responses, and furthered our understanding of IL-10 and the interplay between  
451 positive and negative feedback motifs (Fig. 6). This analysis informs higher order immune regulation and  
452 could pave the way for improved cytokine immunotherapies for autoimmune diseases.

453

#### 454 **Acknowledgments**

455 We thank Andre Levchenko, Smita Krishnaswamy, and David Hafler, as well as members of the Miller-  
456 Jensen lab for insightful advice and helpful discussion. We also thank I. Kelsey for critical reading of the

457 manuscript. This work was supported by the National Institutes of Health (R01-GM123011 to K.M.J., and  
458 RO1-GM072024, to A.L.), and the National Science Foundation (DGE1122492).

459

#### 460 **Author Contributions**

461 Conception: A.F. Alexander, and K. Miller-Jensen. Development of methodology: A.F. Alexander and K.  
462 Miller-Jensen. Acquisition of data: A.F. Alexander, H. Forbes. Analysis and interpretation of data: A.F.  
463 Alexander and K. Miller-Jensen. Writing, review, and/or revision of the manuscript: A.F. Alexander and  
464 K. Miller-Jensen. Study supervision: K. Miller-Jensen.

465

#### 466 **Declaration of Interests**

467 There are no financial or non-financial competing interests.

468

#### 469 **Materials and Methods**

##### 470 *Mouse breeding and cell culture*

471 All mice were housed in the Yale Animal Resources Center in specific pathogen-free conditions. All animal  
472 experiments were performed according to the approved protocols of the Yale University Institutional  
473 Animal Care and Use Committee. Wild type C57BL/6J mice were purchased from Jackson Laboratories.  
474 Bone marrow derived macrophages were generated as previously described (Trouplin et al., 2013). In brief,  
475 bone marrow was extracted from the tibias and femurs of the hind legs of mice with a syringe. Afterwards,  
476 red blood cells were lysed with ammonium-chloride-potassium lysis buffer (Lonza) and the cells were  
477 incubated for 4 hours at 37°C with 5% CO<sub>2</sub> in a non-tissue culture treated petri-dish with BMDM media  
478 (RPMI supplemented with 10% FBS, 100 U/mL penicillin, 100 µg/mL streptomycin, 1% sodium pyruvate,  
479 25 mM HEPES buffer, 2mM L-glutamine, and 50 mM 2-mercaptoethanol). After 4 hours, the non-adherent  
480 cells were transferred to a new non-tissue culture treated petri dish and incubated with BMDM media  
481 supplemented with 20 ng/mL M-CSF (PeproTech). On day 3 after plating, 10 mL of BMDM media  
482 supplemented with 20 ng/mL M-CSF was added to the dish. After 6 days, BMDMs were lifted with



483 PBS+5mM EDTA and gentle scraping. Cell suspensions were seeded onto plates at a density of 250,000  
484 cells/ml for population ELISA experiments or onto the microwell device at a density of 125,000 cells/mL.

485

#### 486 *In vitro treatments and quantification of secretion in population*

487 BMDMs were plated and stimulated in BMDM media with 10 ng/mL M-CSF (PeproTech). Cells were  
488 plated at the appropriate density (described above) and allowed to adhere overnight. Cells were stimulated  
489 with LPS (Invivogen) alone, or co-stimulated with LPS and IL-10R blocking antibody (BioLegend, clone:  
490 1B1.3a), or LPS and recombinant IL-10 (PeproTech), or LPS and IFNAR1 blocking antibody (Invitrogen,  
491 clone: MAR1-5A3) for the times indicated in the legends. Cell culture medium was collected at the end of  
492 the incubation period and was assayed by ELISA according to the manufacturer's instructions. The antibody  
493 pairs used in the ELISAs were the same as those used for the microwell assay and can be found in Table 1.

**Table 1. List of capture and detection antibody pairs used for single-cell secretion profiling**

| Antibody Pair | Vendor         | Catalog No. |
|---------------|----------------|-------------|
| TNF- $\alpha$ | Invitrogen     | 88-7324-88  |
| IL-10         | R&D            | DY417       |
| IL-6          | R&D            | DY406       |
| IL-27         | R&D            | DY1834      |
| CXCL1         | R&D            | DY453       |
| CCL2          | R&D            | DY479       |
| CCL3          | R&D            | DY450       |
| CCL5          | R&D            | DY478       |
| GM-CSF        | R&D            | DY415       |
| Chi3l3        | R&D            | DY2446      |
| IFN- $\beta$  | R&D            | DY8234      |
| IL-12p40      | BD Biosciences | 555165      |

494

#### 495 *Microwell assay for single-cell secretion profiling*

496 Single-cell secretion profiling experiments were performed as previously described (Lu et al., 2013; Xue et  
497 al., 2015) (Appendix A). Briefly, capture antibodies (Table 3.1) were flow patterned onto epoxy silane-  
498 coated glass slides (Super-Chip; ThermoFisher). The polydimethylsiloxane (PDMS) microwell arrays and  
499 antibody barcode glass slides were blocked using complete RPMI. BMDMs were suspended in complete  
500 RPMI supplemented with 10 ng/mL M-CSF and were added to the PDMS microwell array and allowed to

501 adhere overnight. The next day BMDMs were stimulated as indicated with complete RPMI supplemented  
502 with 125 nM of live cell marker (Calcein AM; ThermoFisher) to allow automatic live cell detection. The  
503 BMDMs in the PDMS microwell array were then covered with the antibody barcode slide, secured with  
504 plates and screws, and allowed to incubate for 8 hours. At the end of the incubation period, the device was  
505 imaged with an automated inverted microscope (Axio Observer; ZEISS) to record well position and cell  
506 locations. The device was then disassembled and the sandwich immunoassay was performed: The glass  
507 slide was incubated with a mixture of detection antibodies (Table 3.1) for 2 hours, followed by incubation  
508 with 20 µg/mL streptavidin-APC (eBioscience) for 30 minutes, rinsed with PBS and deionized water, and  
509 scanned with a Genepix 4200A scanner (Molecular Devices).

510

#### 511 ***Single-cell secretion profiling and data processing***

512 Device images were analyzed using a custom script in MATLAB (MathWorks) to automatically detect well  
513 location and number of cells per well, extract all signals from each well, and process the data  
514 (<https://github.com/Miller-JensenLab/Single-Cell-Analysis>). In brief, after automatic well and live cell  
515 detection, signal image registration, and manual curation, the software automatically extracted the intensity  
516 signal from each antibody for all the microwells in the device. This signal across the chip for each individual  
517 antibody was normalized by subtracting a moving Gaussian curve fitted to the local zero-cell well intensity  
518 values. A secretion threshold for each antibody was set at the 99th percentile of all normalized zero-cell  
519 wells. Data was transformed using the inverse hyperbolic sine with cofactor set at 0.8x secretion threshold.

520

#### 521 ***Multidimensional PHATE analysis***

522 To further visualize high-dimensional secretion data from the microwell assay, the dimensionality reduction  
523 algorithm known as potential of heat diffusion for affinity-based transition embedding (PHATE) was used.  
524 PHATE analysis was performed using the available MATLAB and Python packages from the  
525 Krishnaswamy lab (<https://github.com/KrishnaswamyLab/PHATE>). Standard parameters were used to  
526 make 2-dimensional PHATE projections from the 10-dimensional BMDM dataset. Manual adjustments to

527 the t parameter were made for optimal visualization. PHATE plots were colored by density or by relative  
528 secretion levels of each protein as indicated; cells below the secretion threshold were greyed out for  
529 visualization. Extracted PHATE parameters were analyzed using custom software written in MATLAB and  
530 Python.

531

### 532 ***Recombinant protein standard curves***

533 To convert measured fluorescent intensities from the microwell assay to concentrations of cytokines and  
534 chemokines, we used recombinant protein calibration curves (Fig. S3.4). Recombinant protein standard  
535 curves were derived by measuring the intensity values of recombinant proteins of concentrations between  
536 39 and 5000 pg/mL in the microwell assay. The 4 Parameter Logistic (4PL) nonlinear regression model  
537 was used to fit the standard curves, and the 95% confidence intervals were calculated with Prism8  
538 (GraphPad). Concentration values for intensities less than the detection limit of the calibration curve were  
539 set to zero or set to 1 for histogram visualization. For further analysis, interpolated concentration data from  
540 the microwell assay was analyzed using conditional density re-scaled visualization (DREVI). The DREVI  
541 software was used to visualize 2D stochastic relationships in single-cell data using conditional density  
542 estimation, representing how a variable X influences a variable Y, by depicting the distribution of Y for  
543 each value of X. DREVI algorithm was downloaded from the Pe'er Lab website  
544 (<https://dpeerlab.github.io/dpeerlab-website/dremi.html>).

545

### 546 ***Statistical analysis***

547 Data were presented as means  $\pm$  SEM unless otherwise specified. Statistical analysis was performed by  
548 ordinary 2-way ANOVA and the Dunnett method for correction of multiple comparisons as specified in the  
549 figure legends. All analyses were performed using Prism 8.4.1 software (GraphPad). For single-cell  
550 distributions, statistics were performed using a bootstrapping procedure to calculate the confidence intervals  
551 associated with sampling error in single-cell data. To obtain confidence intervals through bootstrapping,  
552 the single-cell datasets for each condition were sampled 10,000 times with replacement, and the metric of

553 interest was calculated for each resampled dataset. We then calculated a 95% confidence interval for these  
554 resampled datasets, and statistical significance was assigned to pairwise comparisons with non-overlapping  
555 confidence intervals. This bootstrapping procedure was done using a custom script in MATLAB.

556

557

## 558 **References**

- 559 Caldwell, A. B., Cheng, Z., Vargas, J. D., Birnbaum, H. A., & Hoffmann, A. (2014). Network dynamics  
560 determine the autocrine and paracrine signaling functions of TNF. *Genes & Development*,  
561 28(19), 2120–2133. <https://doi.org/10.1101/gad.244749.114>
- 562 Cannella, B., Gao, Y. L., Brosnan, C., & Raine, C. S. (1996). IL-10 fails to abrogate experimental  
563 autoimmune encephalomyelitis. *Journal of Neuroscience Research*, 45(6), 735–746.  
564 [https://doi.org/10.1002/\(SICI\)1097-4547\(19960915\)45:6<735::AID-JNR10>3.0.CO;2-V](https://doi.org/10.1002/(SICI)1097-4547(19960915)45:6<735::AID-JNR10>3.0.CO;2-V)
- 565 Chang, E. Y., Guo, B., Doyle, S. E., & Cheng, G. (2007). Cutting Edge: Involvement of the Type I IFN  
566 Production and Signaling Pathway in Lipopolysaccharide-Induced IL-10 Production. *The Journal*  
567 *of Immunology*, 178(11), 6705–6709. <https://doi.org/10.4049/jimmunol.178.11.6705>
- 568 Chang, J., Kunkel, S. L., & Chang, C.-H. (2009). Negative regulation of MyD88-dependent signaling by  
569 IL-10 in dendritic cells. *Proceedings of the National Academy of Sciences of the United States of*  
570 *America*, 106(43), 18327–18332. <https://doi.org/10.1073/pnas.0905815106>
- 571 Conaway, E. A., de Oliveira, D. C., McInnis, C. M., Snapper, S. B., & Horwitz, B. H. (2017). Inhibition  
572 of Inflammatory Gene Transcription by IL-10 Is Associated with Rapid Suppression of  
573 Lipopolysaccharide-Induced Enhancer Activation. *The Journal of Immunology*, 198(7), 2906–  
574 2915. <https://doi.org/10.4049/jimmunol.1601781>
- 575 Covert, M. W. (2005). Achieving Stability of Lipopolysaccharide-Induced NF- B Activation. *Science*,  
576 309(5742), 1854–1857. <https://doi.org/10.1126/science.1112304>
- 577 Dagvadorj, J., Naiki, Y., Tumurkhuu, G., Hassan, F., Islam, S., Koide, N., Mori, I., Yoshida, T., &  
578 Yokochi, T. (2008). Interleukin-10 inhibits tumor necrosis factor- $\alpha$  production in  
579 lipopolysaccharide-stimulated RAW 264.7 cells through reduced MyD88 expression. *Innate*  
580 *Immunity*, 14(2), 109–115. <https://doi.org/10.1177/1753425908089618>
- 581 DRIESSLER, F., VENSTROM, K., SABAT, R., ASADULLAH, K., & SCHOTTELIUS, A. J. (2004).  
582 Molecular mechanisms of interleukin-10-mediated inhibition of NF- $\kappa$ B activity: A role for p50.  
583 *Clinical and Experimental Immunology*, 135(1), 64–73. <https://doi.org/10.1111/j.1365-2249.2004.02342.x>
- 585 Eberwine, J., & Kim, J. (2015). Cellular Deconstruction: Finding Meaning in Individual Cell Variation.  
586 *Trends in Cell Biology*, 25(10), 569–578. <https://doi.org/10.1016/j.tcb.2015.07.004>
- 587 Ernst, O., Glucksam-Galnoy, Y., Bhatta, B., Athamna, M., Ben-Dror, I., Glick, Y., Gerber, D., & Zor, T.  
588 (2019). Exclusive Temporal Stimulation of IL-10 Expression in LPS-Stimulated Mouse  
589 Macrophages by cAMP Inducers and Type I Interferons. *Frontiers in Immunology*, 10, 1788.  
590 <https://doi.org/10.3389/fimmu.2019.01788>
- 591 Fitzgerald, D. C., Fonseca-Kelly, Z., Cullimore, M. L., Safabakhsh, P., Saris, C. J. M., Zhang, G.-X., &  
592 Rostami, A. (2013). Independent and Interdependent Immunoregulatory Effects of IL-27, IFN- $\gamma$ ,  
593 and IL-10 in the Suppression of Human Th17 Cells and Murine Experimental Autoimmune  
594 Encephalomyelitis. *The Journal of Immunology*, 190(7), 3225–3234.  
595 <https://doi.org/10.4049/jimmunol.1200141>
- 596 Gautier, G., Humbert, M., Deauvieu, F., Scullier, M., Hiscott, J., Bates, E. E. M., Trinchieri, G., Caux,  
597 C., & Garrone, P. (2005). A type I interferon autocrine–paracrine loop is involved in Toll-like  
598 receptor-induced interleukin-12p70 secretion by dendritic cells. *Journal of Experimental*  
599 *Medicine*, 201(9), 1435–1446. <https://doi.org/10.1084/jem.20041964>
- 600 Gottschalk, R. A., Dorrington, M. G., Dutta, B., Krauss, K. S., Martins, A. J., Uderhardt, S., Chan, W.,  
601 Tsang, J. S., Torabi-Parizi, P., Fraser, I. D., & Germain, R. N. (2019). IFN-mediated negative

- 602 feedback supports bacteria class-specific macrophage inflammatory responses. *ELife*, 8, e46836.  
603 <https://doi.org/10.7554/eLife.46836>
- 604 Gottschalk, R. A., Martins, A. J., Angermann, B. R., Dutta, B., Ng, C. E., Uderhardt, S., Tsang, J. S.,  
605 Fraser, I. D. C., Meier-Schellersheim, M., & Germain, R. N. (2016). Distinct NF- $\kappa$ B and MAPK  
606 Activation Thresholds Uncouple Steady-State Microbe Sensing from Anti-pathogen  
607 Inflammatory Responses. *Cell Systems*, 2(6), 378–390. <https://doi.org/10.1016/j.cels.2016.04.016>
- 608 Hovsepian, E., Penas, F., Siffo, S., Mirkin, G. A., & Goren, N. B. (2013). IL-10 Inhibits the NF- $\kappa$ B and  
609 ERK/MAPK-Mediated Production of Pro-Inflammatory Mediators by Up-Regulation of SOCS-3  
610 in *Trypanosoma cruzi*-Infected Cardiomyocytes. *PLoS ONE*, 8(11), e79445.  
611 <https://doi.org/10.1371/journal.pone.0079445>
- 612 Howes, A., Taubert, C., Blankley, S., Spink, N., Wu, X., Graham, C. M., Zhao, J., Saraiva, M., Ricciardi-  
613 Castagnoli, P., Bancroft, G. J., & O’Garra, A. (2016). Differential Production of Type I IFN  
614 Determines the Reciprocal Levels of IL-10 and Proinflammatory Cytokines Produced by  
615 C57BL/6 and BALB/c Macrophages. *The Journal of Immunology*, 197(7), 2838–2853.  
616 <https://doi.org/10.4049/jimmunol.1501923>
- 617 Hu, X., Chakravarty, S. D., & Ivashkiv, L. B. (2008). Regulation of IFN and TLR Signaling During  
618 Macrophage Activation by Opposing Feedforward and Feedback Inhibition Mechanisms.  
619 *Immunological Reviews*, 226, 41–56. <https://doi.org/10.1111/j.1600-065X.2008.00707.x>
- 620 Hutchins, A. P., Diez, D., & Miranda-Saavedra, D. (2013). The IL-10/STAT3-mediated anti-  
621 inflammatory response: Recent developments and future challenges. *Briefings in Functional  
622 Genomics*, 12(6), 489–498. <https://doi.org/10.1093/bfpg/elt028>
- 623 Iyer, S. S., Ghaffari, A. A., & Cheng, G. (2010). Lipopolysaccharide-Mediated IL-10 Transcriptional  
624 Regulation Requires Sequential Induction of Type I IFNs and IL-27 in Macrophages. *The Journal  
625 of Immunology*, 185(11), 6599–6607. <https://doi.org/10.4049/jimmunol.1002041>
- 626 Iyer, Shankar Subramanian, & Cheng, G. (2012). Role of Interleukin 10 Transcriptional Regulation in  
627 Inflammation and Autoimmune Disease. *Critical Reviews<sup>TM</sup> in Immunology*, 32(1), 23–63.  
628 <https://doi.org/10.1615/CritRevImmunol.v32.i1.30>
- 629 Katsikis, P. D., Chu, C. Q., Brennan, F. M., Maini, R. N., & Feldmann, M. (1994). Immunoregulatory  
630 role of interleukin 10 in rheumatoid arthritis. *The Journal of Experimental Medicine*, 179(5),  
631 1517–1527. <https://doi.org/10.1084/jem.179.5.1517>
- 632 Krishnaswamy, S., Spitzer, M. H., Mingueneau, M., Bendall, S. C., Litvin, O., Stone, E., Pe’er, D., &  
633 Nolan, G. P. (2014). Conditional density-based analysis of T cell signaling in single-cell data.  
634 *Science*, 346(6213), 1250689. <https://doi.org/10.1126/science.1250689>
- 635 Kühn, R., Löhler, J., Rennick, D., Rajewsky, K., & Müller, W. (1993). Interleukin-10-deficient mice  
636 develop chronic enterocolitis. *Cell*, 75(2), 263–274. [https://doi.org/10.1016/0092-8674\(93\)80068-  
637 P](https://doi.org/10.1016/0092-8674(93)80068-P)
- 638 Lee, T. K., Denny, E. M., Sanghvi, J. C., Gaston, J. E., Maynard, N. D., Hughey, J. J., & Covert, M. W.  
639 (2009). A Noisy Paracrine Signal Determines the Cellular NF- $\kappa$ B Response to  
640 Lipopolysaccharide. *Science Signaling*, 2(93), ra65–ra65.  
641 <https://doi.org/10.1126/scisignal.2000599>
- 642 Lu, Y., Chen, J. J., Mu, L., Xue, Q., Wu, Y., Wu, P.-H., Li, J., Vortmeyer, A. O., Miller-Jensen, K.,  
643 Wirtz, D., & Fan, R. (2013). High-Throughput Secretomic Analysis of Single Cells to Assess  
644 Functional Cellular Heterogeneity. *Analytical Chemistry*, 85(4), 2548–2556.  
645 <https://doi.org/10.1021/ac400082e>

- 646 Lu, Y., Xue, Q., Eisele, M. R., Sulistijo, E. S., Brower, K., Han, L., Amir, E. D., Pe'er, D., Miller-Jensen,  
647 K., & Fan, R. (2015). Highly multiplexed profiling of single-cell effector functions reveals deep  
648 functional heterogeneity in response to pathogenic ligands. *Proceedings of the National Academy  
649 of Sciences*, 112(7), E607–E615. <https://doi.org/10.1073/pnas.1416756112>
- 650 McNab, F. W., Ewbank, J., Howes, A., Moreira-Teixeira, L., Martirosyan, A., Ghilardi, N., Saraiva, M.,  
651 & O'Garra, A. (2014). Type I IFN Induces IL-10 Production in an IL-27–Independent Manner  
652 and Blocks Responsiveness to IFN- $\gamma$  for Production of IL-12 and Bacterial Killing in  
653 *Mycobacterium tuberculosis* –Infected Macrophages. *The Journal of Immunology*, 193(7), 3600–  
654 3612. <https://doi.org/10.4049/jimmunol.1401088>
- 655 McWhorter, F. Y., Smith, T. D., Luu, T. U., Rahim, M. K., Haun, J. B., & Liu, W. F. (2016). Macrophage  
656 secretion heterogeneity in engineered microenvironments revealed using a microwell platform.  
657 *Integrative Biology*, 8(7), 751–760. <https://doi.org/10.1039/C6IB00053C>
- 658 Medzhitov, R. (2008). Origin and physiological roles of inflammation. *Nature*, 454(7203), 428–435.  
659 <https://doi.org/10.1038/nature07201>
- 660 Mittal, S. K., & Roche, P. A. (2015). Suppression of antigen presentation by IL-10. *Current Opinion in  
661 Immunology*, 34, 22–27. <https://doi.org/10.1016/j.coi.2014.12.009>
- 662 Moon, K. R., van Dijk, D., Wang, Z., Gigante, S., Burkhardt, D. B., Chen, W. S., Yim, K., Elzen, A. van  
663 den, Hirn, M. J., Coifman, R. R., Ivanova, N. B., Wolf, G., & Krishnaswamy, S. (2019).  
664 Visualizing structure and transitions in high-dimensional biological data. *Nature Biotechnology*,  
665 37(12), 1482–1492. <https://doi.org/10.1038/s41587-019-0336-3>
- 666 Moon, K. R., van Dijk, D., Wang, Z., Gigante, S., Burkhardt, D., Chen, W., van den Elzen, A., Hirn, M.  
667 J., Coifman, R. R., Ivanova, N. B., Wolf, G., & Krishnaswamy, S. (2018). Visualizing Transitions  
668 and Structure for Biological Data Exploration. <https://doi.org/10.1101/120378>
- 669 Muldoon, J. J., Chuang, Y., Bagheri, N., & Leonard, J. N. (2020). Macrophages employ quorum licensing  
670 to regulate collective activation. *Nature Communications*, 11(1), 878.  
671 <https://doi.org/10.1038/s41467-020-14547-y>
- 672 Murray, P. J. (2005). The primary mechanism of the IL-10-regulated antiinflammatory response is to  
673 selectively inhibit transcription. *Proceedings of the National Academy of Sciences*, 102(24),  
674 8686–8691. <https://doi.org/10.1073/pnas.0500419102>
- 675 Murray, Peter J., & Smale, S. T. (2012). Restraint of inflammatory signaling by interdependent strata of  
676 negative regulatory pathways. *Nature Immunology*, 13(10), 916–924.  
677 <https://doi.org/10.1038/ni.2391>
- 678 O'Garra, A., Barrat, F. J., Castro, A. G., Vicari, A., & Hawrylowicz, C. (2008). Strategies for use of IL-  
679 10 or its antagonists in human disease. *Immunological Reviews*, 223(1), 114–131.  
680 <https://doi.org/10.1111/j.1600-065X.2008.00635.x>
- 681 Ramji, R., Alexander, A. F., Muñoz-Rojas, A. R., Kellman, L. N., & Miller-Jensen, K. (2019).  
682 Microfluidic platform enables live-cell imaging of signaling and transcription combined with  
683 multiplexed secretion measurements in the same single cells. *Integrative Biology*, 11(4), 142–  
684 153. <https://doi.org/10.1093/intbio/zyz013>
- 685 Rand, U., Rinas, M., Schwerk, J., Nöhren, G., Linnes, M., Kröger, A., Flossdorf, M., Kály-Kullai, K.,  
686 Hauser, H., Höfer, T., & Köster, M. (2012). Multi-layered stochasticity and paracrine signal  
687 propagation shape the type-I interferon response. *Molecular Systems Biology*, 8(1), 584.  
688 <https://doi.org/10.1038/msb.2012.17>



- 689 Saxena, A., Khosraviani, S., Noel, S., Mohan, D., Donner, T., & Hamad, A. R. A. (2015). Interleukin-10  
690 paradox: A potent immunoregulatory cytokine that has been difficult to harness for  
691 immunotherapy. *Cytokine*, 74(1), 27–34. <https://doi.org/10.1016/j.cyto.2014.10.031>
- 692 Shalek, A. K., Satija, R., Adiconis, X., Gertner, R. S., Gaublomme, J. T., Raychowdhury, R., Schwartz,  
693 S., Yosef, N., Malboeuf, C., Lu, D., Trombetta, J. J., Gennert, D., Gnirke, A., Goren, A.,  
694 Hacohen, N., Levin, J. Z., Park, H., & Regev, A. (2013). Single-cell transcriptomics reveals  
695 bimodality in expression and splicing in immune cells. *Nature*, 498(7453), 236–240.  
696 <https://doi.org/10.1038/nature12172>
- 697 Shalek, A. K., Satija, R., Shuga, J., Trombetta, J. J., Gennert, D., Lu, D., Chen, P., Gertner, R. S.,  
698 Gaublomme, J. T., Yosef, N., Schwartz, S., Fowler, B., Weaver, S., Wang, J., Wang, X., Ding,  
699 R., Raychowdhury, R., Friedman, N., Hacohen, N., ... Regev, A. (2014). Single-cell RNA-seq  
700 reveals dynamic paracrine control of cellular variation. *Nature*, 510(7505), 363–369.  
701 <https://doi.org/10.1038/nature13437>
- 702 Spits, H., & de Waal Malefyt, R. (1992). Functional Characterization of Human IL-10. *International*  
703 *Archives of Allergy and Immunology*, 99(1), 8–15. <https://doi.org/10.1159/000236329>
- 704 Trouplin, V., Boucherit, N., Gorvel, L., Conti, F., Mottola, G., & Ghigo, E. (2013). Bone Marrow-derived  
705 Macrophage Production. *Journal of Visualized Experiments*, 81, 50966.  
706 <https://doi.org/10.3791/50966>
- 707 Werner, S. L. (2005). Stimulus Specificity of Gene Expression Programs Determined by Temporal  
708 Control of IKK Activity. *Science*, 309(5742), 1857–1861.  
709 <https://doi.org/10.1126/science.1113319>
- 710 Xue, Q., Lu, Y., Eisele, M. R., Sulistijo, E. S., Khan, N., Fan, R., & Miller-Jensen, K. (2015). Analysis of  
711 single-cell cytokine secretion reveals a role for paracrine signaling in coordinating macrophage  
712 responses to TLR4 stimulation. *Science Signaling*, 8(381), ra59–ra59.  
713 <https://doi.org/10.1126/scisignal.aaa2155>
- 714 Youk, H., & Lim, W. A. (2014). Secreting and Sensing the Same Molecule Allows Cells to Achieve  
715 Versatile Social Behaviors. *Science*, 343(6171), 1242782–1242782.  
716 <https://doi.org/10.1126/science.1242782>
- 717



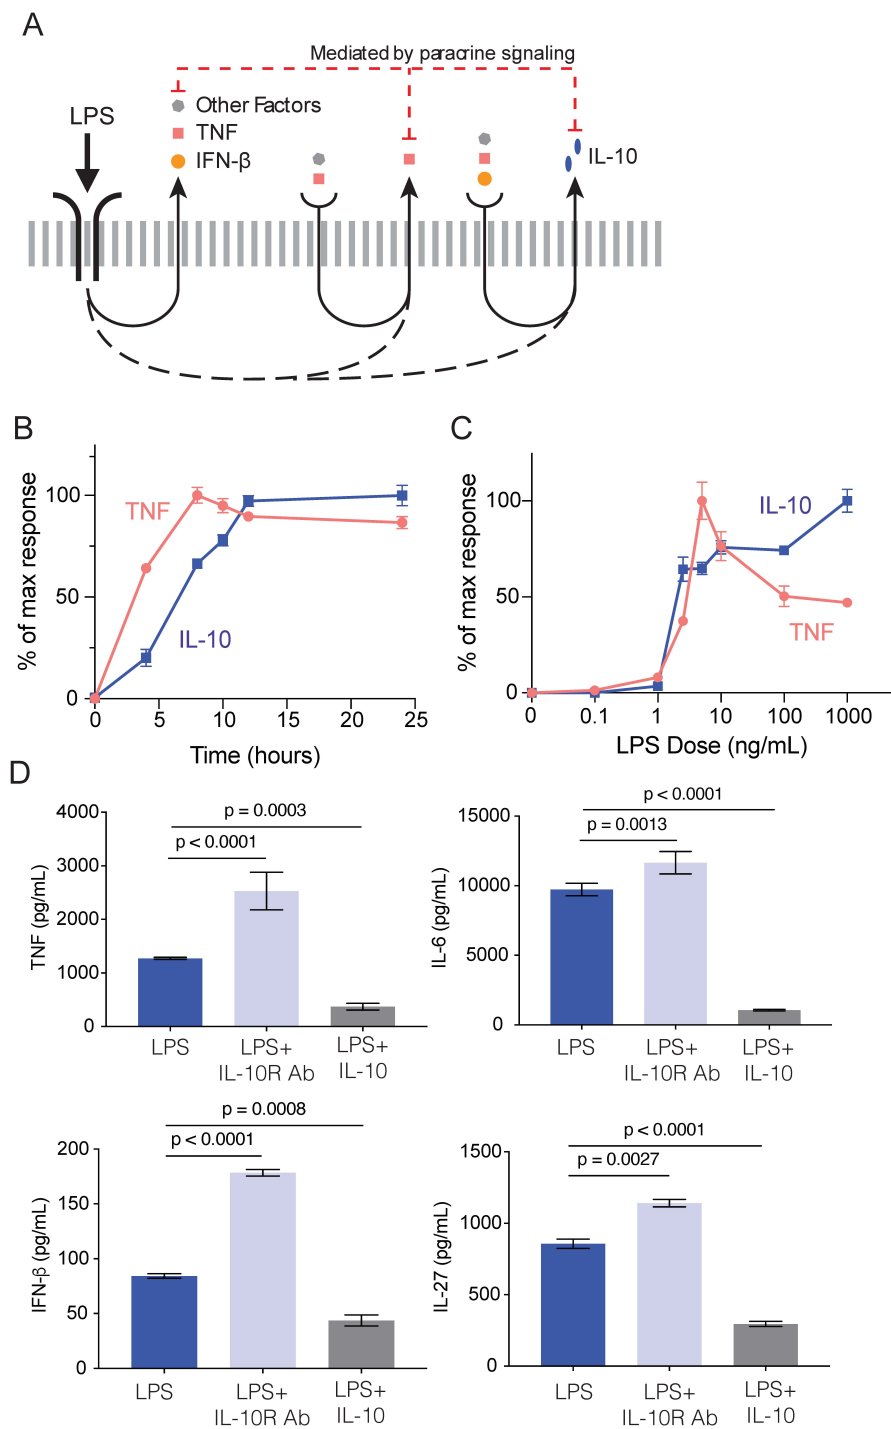

**Fig. 1. IL-10 suppresses TLR4-induced proinflammatory activation in a dose-dependent manner. (A)**

Schematic model illustrating how IL-10 negative feedback and paracrine signaling drive LPS-stimulated cytokine secretion. (B) BMDMs, derived from C57BL/6 mice, were stimulated with 100 ng/mL LPS for the indicated time points, after which cell supernatants were collected and TNF and IL-10 concentration measured by ELISA. (C) BMDMs were stimulated with the indicated doses of LPS for 8 hours, after which cell supernatants were collected and TNF and IL-10 concentration measured by ELISA. (D) BMDMs were stimulated with 100 ng/mL LPS alone, or co-stimulated with IL-10R Ab (30  $\mu$ g/mL) to inhibit negative feedback, or co-stimulated with recombinant IL-10 (10 ng/mL) to enhance negative feedback. After 24 hours of stimulation cell supernatants were collected and cytokine production measured by ELISA. p-values determined by ordinary 2-way ANOVA. Data shown are mean  $\pm$  SEM of 3 biological replicates.

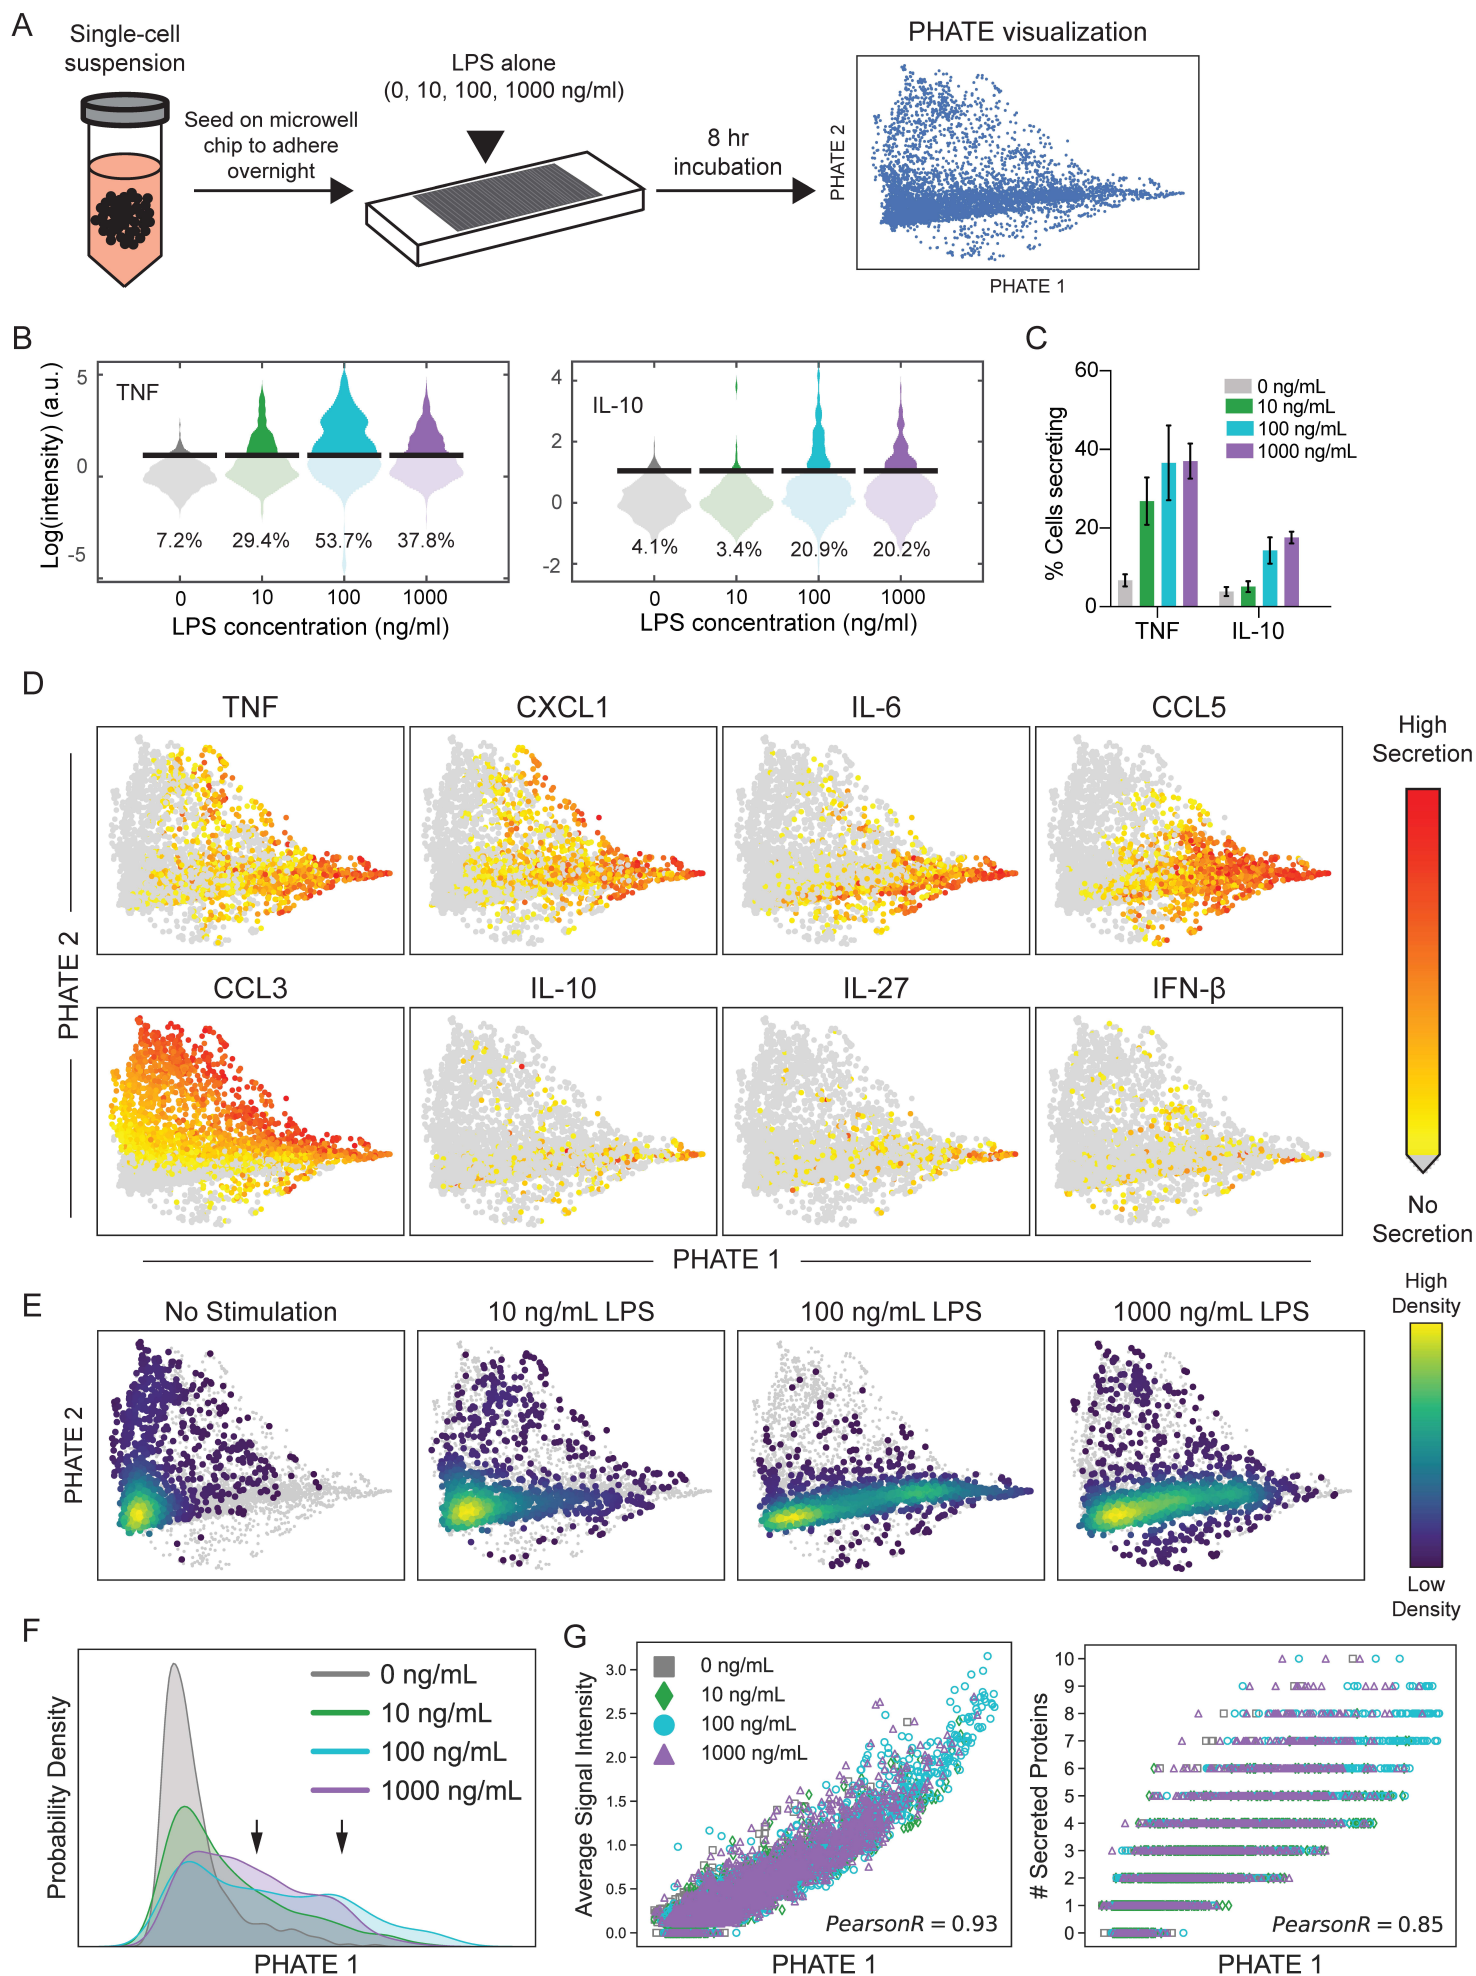

**Fig. 2. High-dimensional analysis reveals TLR4-activated macrophages exhibit dose-dependent digital and analog activation of the proinflammatory secretion program** (A) Experimental set-up for single-cell secretion profiling in the microwell device. BMDMs were seeded onto the PDMS microwell chip and allowed to adhere overnight. Individual cells were stimulated with increasing doses (0, 10, 100, 1000 ng/mL) of LPS for 8 hours. High-dimensional secretion data was then visualized by PHATE analysis. (B) Violin plots of single-cell secretion from individual BMDMs stimulated with increasing doses of LPS in the microwell assay. Black bar indicates fluorescent threshold of detection, arbitrary units (a.u.). Data are one representative experiment. (C) Bar graph depicts average percentage of cells secreting TNF and IL-10 above threshold in response to the indicated LPS stimulation dose after 8 hours in the microwell assay. Data shown are mean with 95% confidence intervals calculated by bootstrapping. (D and E) 2D PHATE embeddings of 10-dimensional single-cell secretion from isolated BMDMs stimulated with LPS as indicated in A. Data shown include activated macrophages (i.e. secreting at least 1 cytokine from Table 1) colored by (D) relative intensity of the indicated cytokine or (E) the kernel density estimate for cells at the indicated LPS stimulation dose (other doses shown in grey for visualization). Data pooled from 3 independent experiments. (F) Kernel density estimation for individual BMDMs along the PHATE 1 axis stimulated as indicated and calculated from data in E. (G) Scatter plots showing correlation between the PHATE 1 coordinates and the average signal intensity of all proteins secreted by each cell (left), or the number of proteins co-secreted (right) in the microwell device.

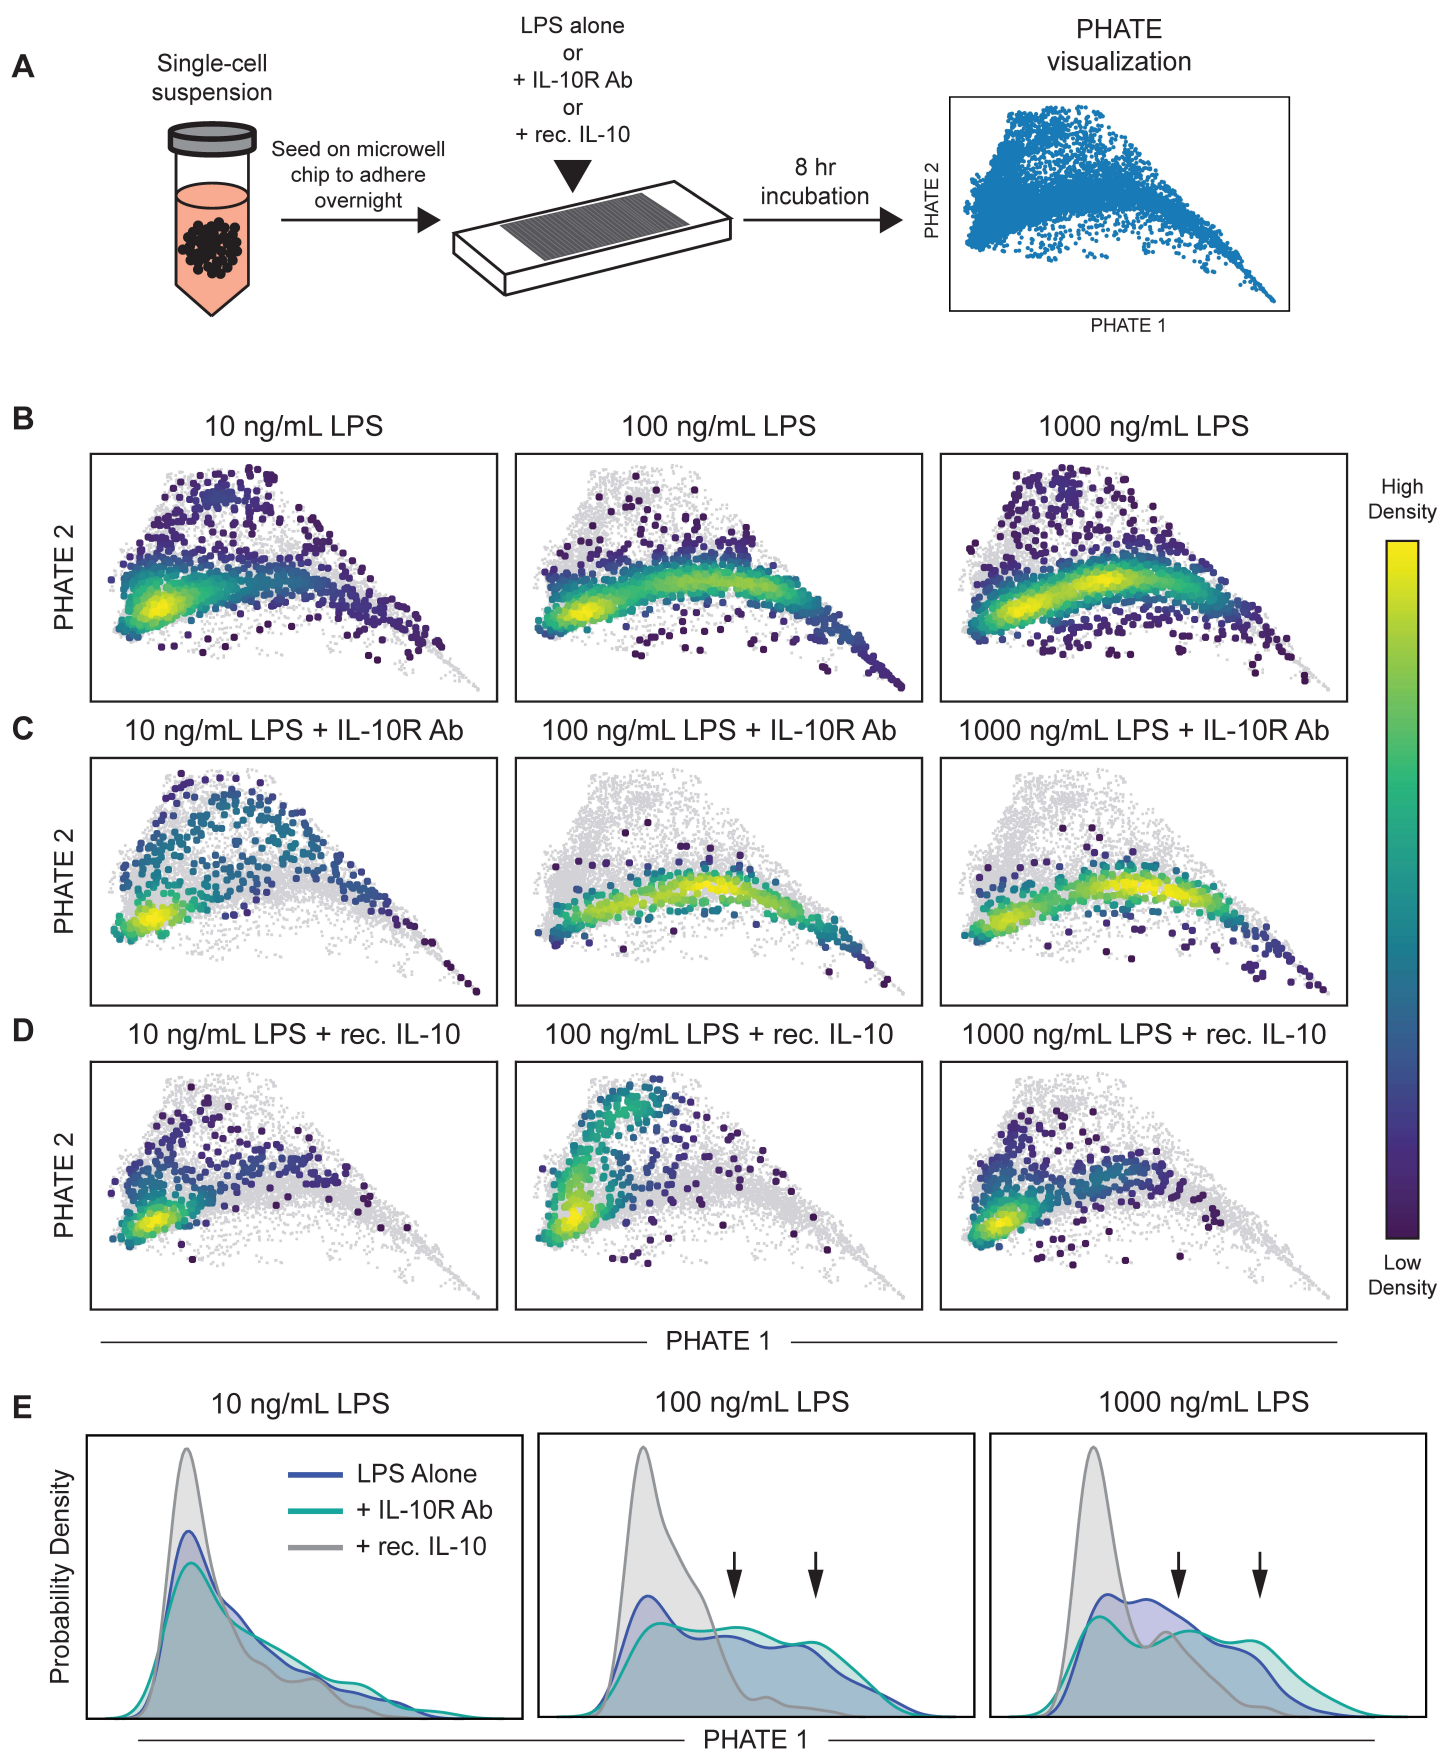

**Fig. 3. High-dimensional analysis reveals IL-10 negative feedback modulates heterogeneity in the macrophage responder population.** (A) Experimental set-up for single-cell secretion profiling in the microwell device and subsequent data visualization by PHATE. (B) 2D PHATE projection of 10-dimensional single-cell secretion data of BMDMs stimulated for 8 hours with the indicated dose of LPS alone, (C) co-stimulated with LPS and IL-10R Ab (30  $\mu\text{g}/\text{mL}$ ), or (D) co-stimulated with recombinant IL-10 (10  $\text{ng}/\text{mL}$ ). (B-D) Data shown are colored by kernel density estimates (KDE) for the indicated subpopulation of cells (other cells greyed out for visualization). (E) Kernel density estimation for individual BMDMs along the PHATE 1 axis stimulated as indicated and calculated from data shown in B–D. Arrows indicate intermediate and high modes of the trimodal PHATE 1 KDE distribution.

**A**

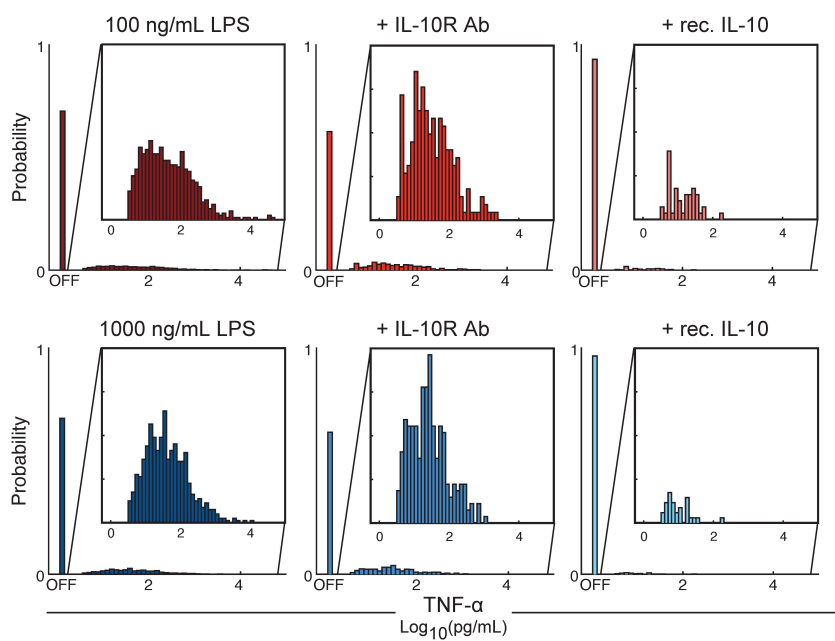

**B**

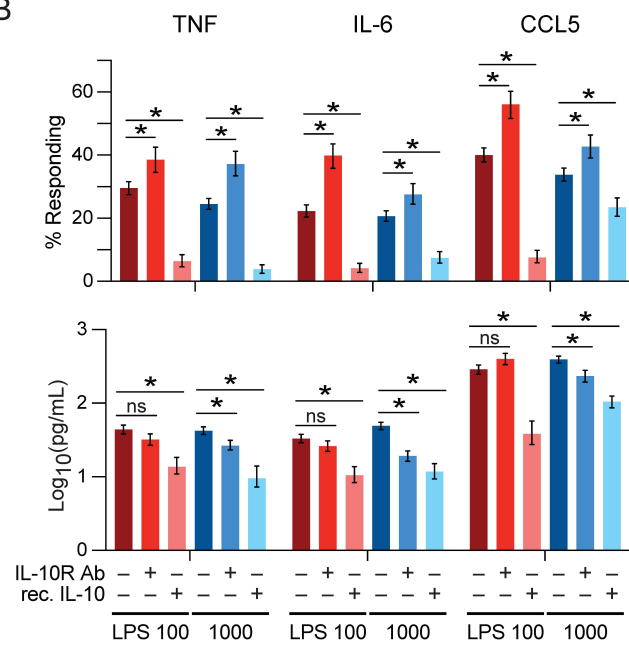

**C**

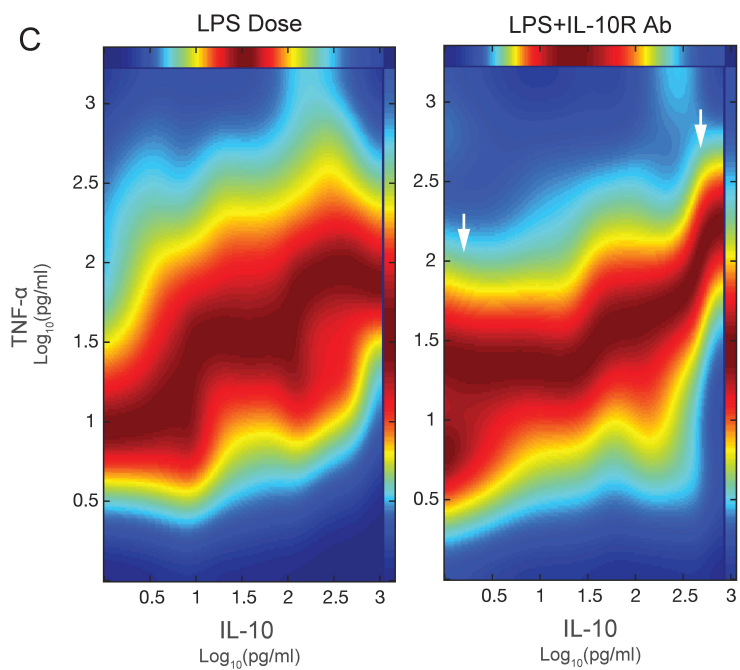

**D**

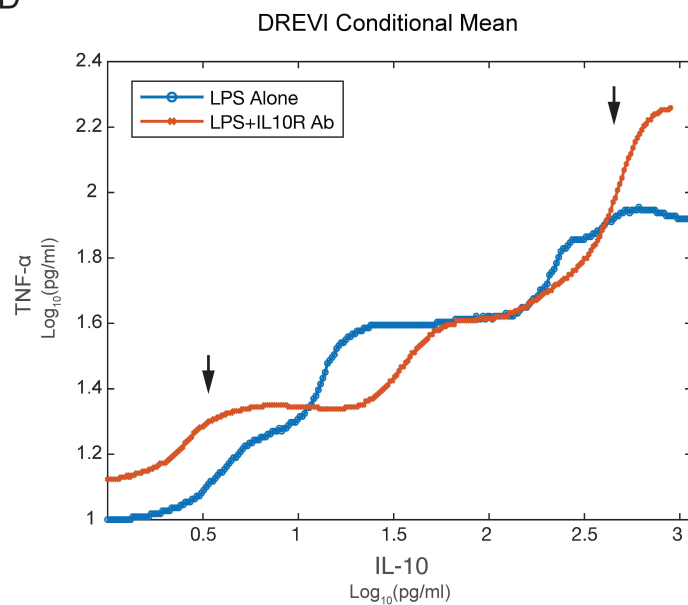



**Fig. 4. Conditional-density visualization reveals low and high levels of IL-10 negative feedback differentially modulates proinflammatory activation in TLR4-stimulated macrophages.** (A-D) Fluorescent intensities from the microwell assay were converted to protein concentrations using recombinant protein standard curves (See materials and methods for details). LPS alone data are pooled from 3 independent experiments, IL-10R Ab data pooled from 2 independent experiments, rec. IL-10 data are one representative experiment. (A) Probability histograms for TNF secretion after 8 hours of the indicated stimulation in the microwell device. Non-responding cells were set to 1 for visualization (labeled “OFF”). Inset graphs show only the responding (TNF+) subpopulation. (B) Bar graphs depict the average percentage of cells secreting the indicated cytokine/chemokine above threshold in response to the indicated stimulation cues after 8 hours in the microwell assay (top), or mean secretion level from responding subpopulation of cells (only cells secreting indicated cytokine/chemokine above detection threshold in microwell device) (bottom). Data shown are mean with 95% confidence intervals calculated by bootstrapping. Significance determined by non-overlap of confidence intervals. (C and D) Conditional density re-scaled visualization (DREVI) plots showing the relationship between IL-10 and TNF. Data shown are pooled to include all stimulation doses (0, 10, 100, 1000 ng/mL LPS with or without IL-10R Ab at 30  $\mu$ g/mL) where the 2 indicated cytokines were co-secreted during the 8-hour incubation (LPS alone: n=516, +IL-10R Ab: n=212). Arrows indicate areas of low and high IL-10 secretion most affected by IL-10 negative feedback. (D) Edge response functions for DREVI plots shown in C were fit according to the conditional mean at the region of highest conditional density.



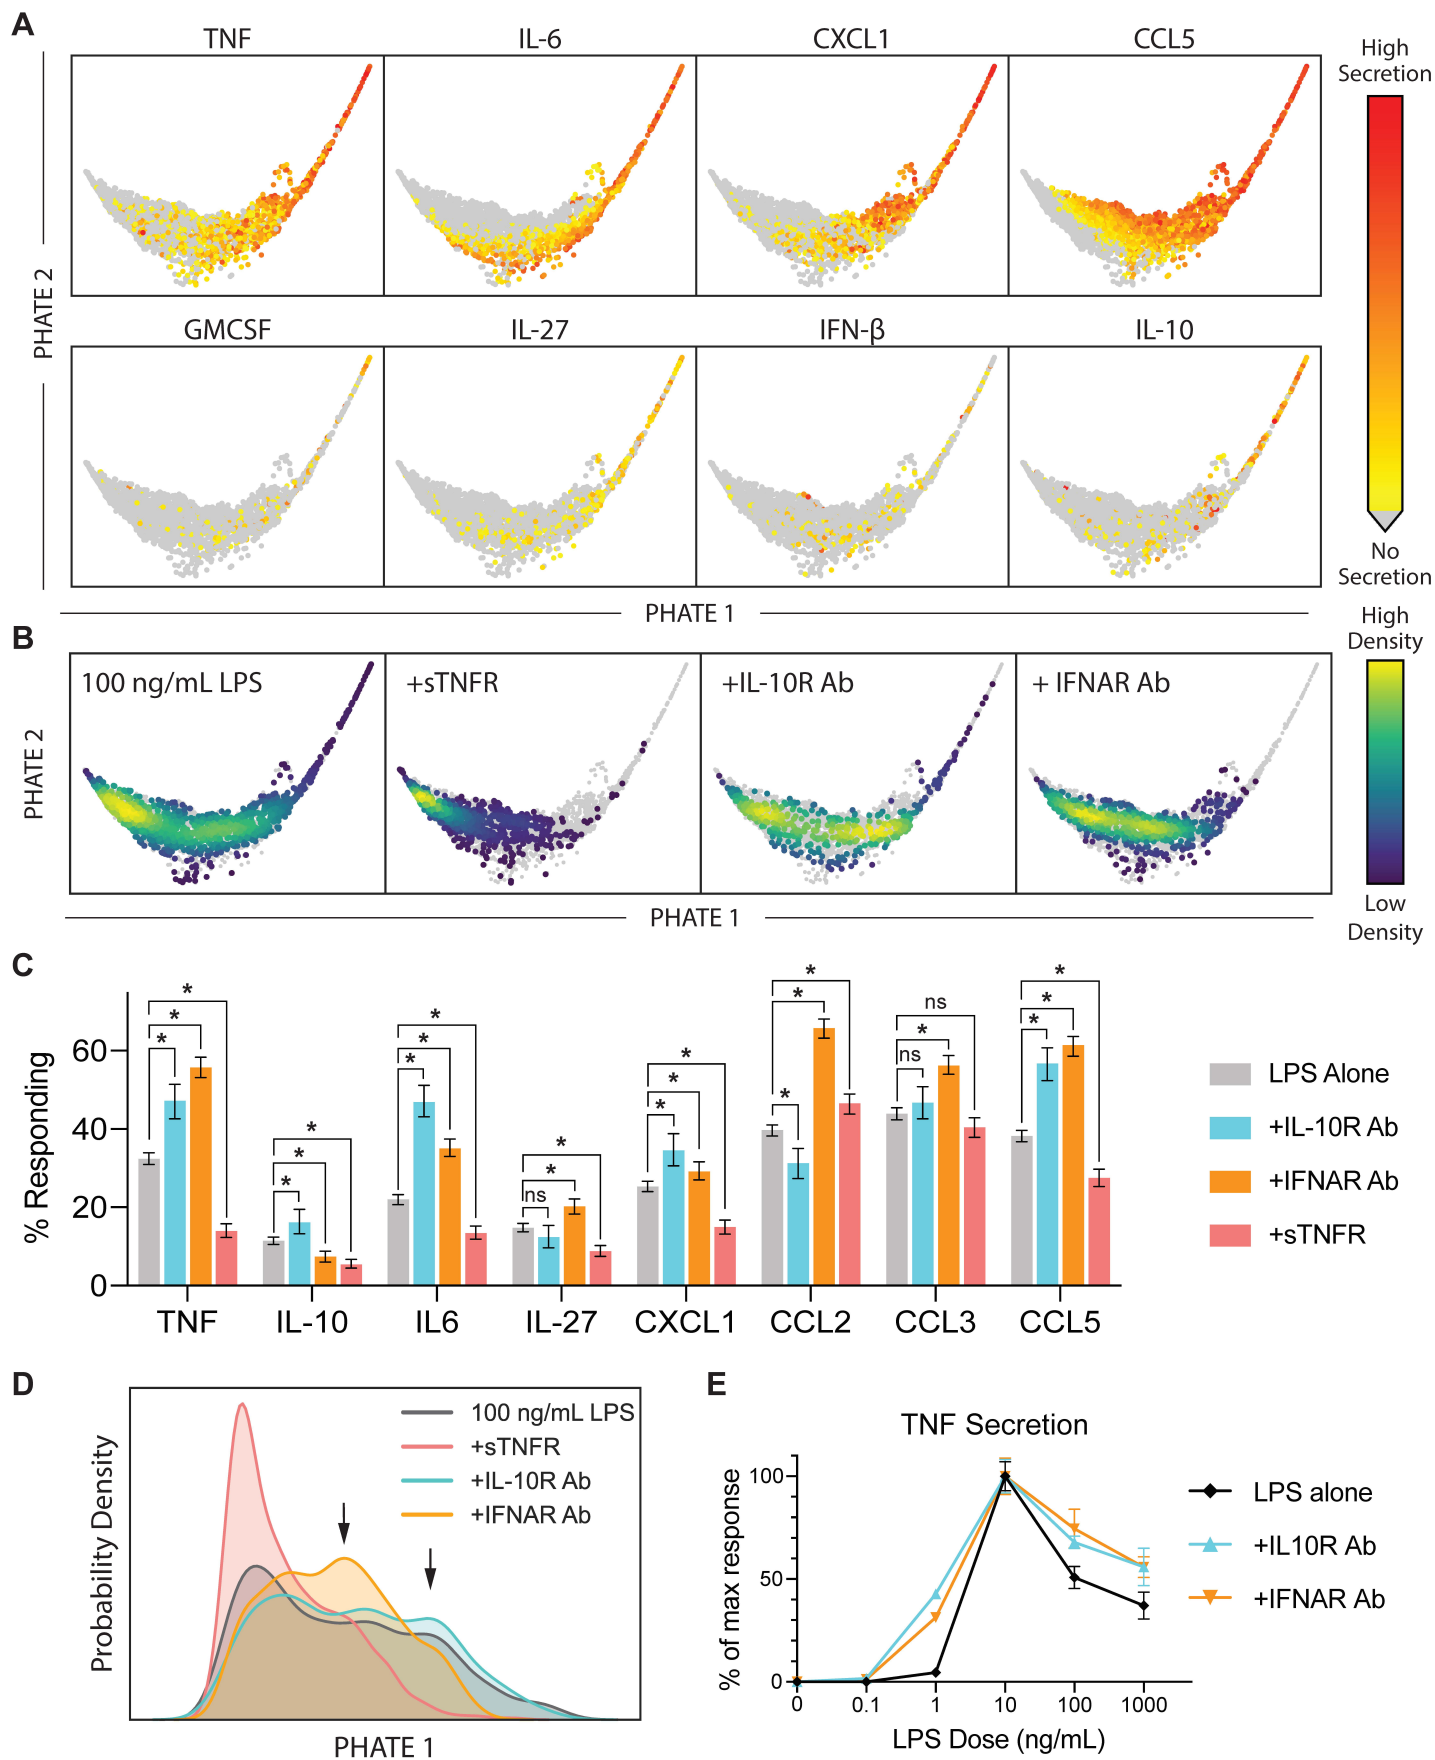

**Fig. 5. IFN- $\beta$  largely mediates IL-10 regulation of the threshold for TLR4 activation, while TNF positive feedback activates the resolving role of IL-10.** 2D PHATE projection of 10-dimensional single-cell secretion data from BMDMs stimulated with 100 ng/mL LPS or co-stimulated with IL-10R Ab (30  $\mu$ g/mL), IFNAR Ab (5  $\mu$ g/mL), or sTNFR (5  $\mu$ g/mL) for 8 hours in the microwell device. (A) Data are colored by relative secretion intensity of the indicated protein. (B) Data shown are colored by cell density for the indicated subpopulation of cells (other cells greyed out for visualization). (C) Bar graphs show percentage of cells secreting the indicated cytokine/chemokine above threshold in response to the indicated stimulation cues after 8 hours in the microwell assay. Data shown are mean with 95% confidence intervals calculated by bootstrapping. Significance determined by non-overlap of confidence intervals. (D) Kernel density estimation for individual BMDMs along the PHATE 1 axis stimulated as indicated and calculated from data shown in A–B. Arrows indicate intermediate and high modes of the trimodal PHATE 1 distribution. LPS alone data pooled from 3 independent experiments. IL-10R and IFNAR data are each one representative experiment. sTNFR data pooled from 2 independent experiments. (E) BMDMs were stimulated with the indicated doses of LPS alone or co-stimulated as indicated for 24 hours, after which cell supernatants were collected and TNF production measured by ELISA. Data shown are mean  $\pm$  SEM of 2 biological replicates.

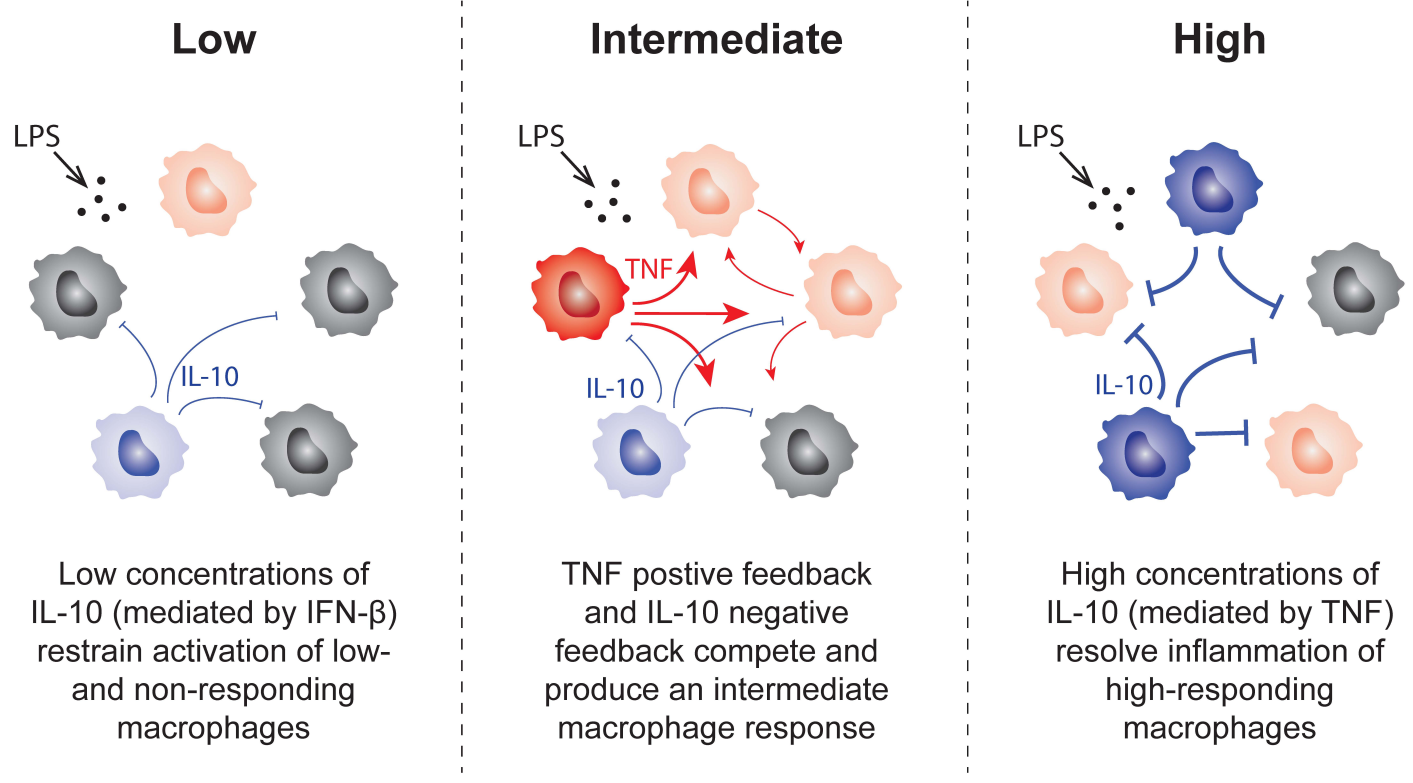

Low concentrations of IL-10 (mediated by IFN- $\beta$ ) restrain activation of low- and non-responding macrophages

TNF positive feedback and IL-10 negative feedback compete and produce an intermediate macrophage response

High concentrations of IL-10 (mediated by TNF) resolve inflammation of high-responding macrophages

**Fig. 6. IL-10 plays a dual role in restraining and resolving the TLR4-induced inflammatory response.**

Schematic model illustrating dual roles for IL-10 in the TLR4 response. At low levels of TLR4-induced activation, low concentrations of IL-10 secretion mediated by intermediate IFN- $\beta$  signaling restrain proinflammatory activation of low and non-responding macrophages by raising the activation threshold (left). At high levels of TLR4-induced proinflammatory activation, high concentrations of IL-10 negative feedback mediated by intermediate TNF signaling act to resolve highly-active proinflammatory cells and avoid overresponse (right).
